# Supplementary material for: Tall Pinus luzmariae trees with genes from P. herrerae
Source: PeerJ. 2020 Feb 26;8:e8648. doi: 10.7717/peerj.8648 (PMC7049253; doi:10.7717/peerj.8648)
Supplement: Table S4 [file peerj-08-8648-s002.xlsx]

## Sheet: Table S4_P.herrerae_Vouchers
Table S4	Pinus herrerae (PH); PH-A=Manchon del Abies, PH-V= La Ventana
Vouchers Pinus herrerae	Site	Tree number	Comments	W	N	UTM Zone 13 N
S. González and S. Simental PH-A 1	México, Durango: Pueblo Nuevo, Comunidad Lajas, Manchón del Abies	1		495222	2564399
S. González and S. Simental PH-A 4	México, Durango: Pueblo Nuevo, Comunidad Lajas, Manchón del Abies	4		495220	2564386
S. González and S. Simental PH-A 7	México, Durango: Pueblo Nuevo, Comunidad Lajas, Manchón del Abies	7		495292	2564348
S. González and S. Simental PH-A 10	México, Durango: Pueblo Nuevo, Comunidad Lajas, Manchón del Abies	10		495294	2564282
S. González and S. Simental PH-A 13	México, Durango: Pueblo Nuevo, Comunidad Lajas, Manchón del Abies	13		495279	2564270
S. González and S. Simental PH-A 16	México, Durango: Pueblo Nuevo, Comunidad Lajas, Manchón del Abies	16		495271	2564225
S. González and S. Simental PH-A 22	México, Durango: Pueblo Nuevo, Comunidad Lajas, Manchón del Abies	22		495334	2564235
S. González and S. Simental PH-A 25	México, Durango: Pueblo Nuevo, Comunidad Lajas, Manchón del Abies	25		495354	2564251
S. González and S. Simental PH-A 31	México, Durango: Pueblo Nuevo, Comunidad Lajas, Manchón del Abies	31	only cone	495426	2564242
S. González and S. Simental PH-A 34	México, Durango: Pueblo Nuevo, Comunidad Lajas, Manchón del Abies	34		495473	2564218
S. González and S. Simental PH-A 37	México, Durango: Pueblo Nuevo, Comunidad Lajas, Manchón del Abies	37		495512	2564263
S. González and S. Simental PH-A 40	México, Durango: Pueblo Nuevo, Comunidad Lajas, Manchón del Abies	40		495529	2564281
S. González and S. Simental PH-A 43	México, Durango: Pueblo Nuevo, Comunidad Lajas, Manchón del Abies	43		495568	2564298
S. González and S. Simental PH-A 46	México, Durango: Pueblo Nuevo, Comunidad Lajas, Manchón del Abies	46		495531	2564287
S. González and S. Simental PH-A 49	México, Durango: Pueblo Nuevo, Comunidad Lajas, Manchón del Abies	49		495490	2564332
S. González and S. Simental PH-A 52	México, Durango: Pueblo Nuevo, Comunidad Lajas, Manchón del Abies	52		495446	2564272
S. González and S. Simental PH-A 55	México, Durango: Pueblo Nuevo, Comunidad Lajas, Manchón del Abies	55		495403	2564313
S. González and S. Simental PH-A 58	México, Durango: Pueblo Nuevo, Comunidad Lajas, Manchón del Abies	58		495380	2564289
S. González and S. Simental PH-A 64	México, Durango: Pueblo Nuevo, Comunidad Lajas, Manchón del Abies	64		495317	2564284
S. González and S. Simental PH-A 67	México, Durango: Pueblo Nuevo, Comunidad Lajas, Manchón del Abies	67		495297	2564311
S. González and S. Simental PH-A 70	México, Durango: Pueblo Nuevo, Comunidad Lajas, Manchón del Abies	70		495271	2564339
S. González and S. Simental PH-A 73	México, Durango: Pueblo Nuevo, Comunidad Lajas, Manchón del Abies	73		495260	2564392
S. González and S. Simental PH-A 76	México, Durango: Pueblo Nuevo, Comunidad Lajas, Manchón del Abies	76		495255	2564410
S. González and S. Simental PH-A 79	México, Durango: Pueblo Nuevo, Comunidad Lajas, Manchón del Abies	79		495218	2564411
S. González and S. Simental PH-A 88	México, Durango: Pueblo Nuevo, Comunidad Lajas, Manchón del Abies	88		495287	2564388
S. González and S. Simental PH-A 91	México, Durango: Pueblo Nuevo, Comunidad Lajas, Manchón del Abies	91		495299	2564328
S. González and S. Simental PH-A 94	México, Durango: Pueblo Nuevo, Comunidad Lajas, Manchón del Abies	94		495367	2564311
S. González and S. Simental PH-A 97	México, Durango: Pueblo Nuevo, Comunidad Lajas, Manchón del Abies	97		495393	2564330
S. González and S. Simental PH-A 100	México, Durango: Pueblo Nuevo, Comunidad Lajas, Manchón del Abies	100		495411	2564345
S. González and S. Simental PH-A 103	México, Durango: Pueblo Nuevo, Comunidad Lajas, Manchón del Abies	103		495424	2564325
S. González and S. Simental PH-A 106	México, Durango: Pueblo Nuevo, Comunidad Lajas, Manchón del Abies	106		495449	2564308
S. González and S. Simental PH-A 112	México, Durango: Pueblo Nuevo, Comunidad Lajas, Manchón del Abies	112		495440	2564387
S. González and S. Simental PH-A 118	México, Durango: Pueblo Nuevo, Comunidad Lajas, Manchón del Abies	118		495400	2564407
S. González and S. Simental PH-A 124	México, Durango: Pueblo Nuevo, Comunidad Lajas, Manchón del Abies	124	only cone	495395	2564367
S. González and S. Simental PH-A 127	México, Durango: Pueblo Nuevo, Comunidad Lajas, Manchón del Abies	127		495348	2564348
S. González and S. Simental PH-A 130	México, Durango: Pueblo Nuevo, Comunidad Lajas, Manchón del Abies	130		495344	2564388
S. González and S. Simental PH-V 1	México, Durango: Pueblo Nuevo, Comunidad Lajas, La Ventana	1		497888	2565990
S. González and S. Simental PH-V 4	México, Durango: Pueblo Nuevo, Comunidad Lajas, La Ventana	4		497873	2566043
S. González and S. Simental PH-V 7	México, Durango: Pueblo Nuevo, Comunidad Lajas, La Ventana	7		497854	2566066
S. González and S. Simental PH-V 10	México, Durango: Pueblo Nuevo, Comunidad Lajas, La Ventana	10		497812	2566054
S. González and S. Simental PH-V 13	México, Durango: Pueblo Nuevo, Comunidad Lajas, La Ventana	13		497826	2566002
S. González and S. Simental PH-V 19	México, Durango: Pueblo Nuevo, Comunidad Lajas, La Ventana	19		497888	2566057
S. González and S. Simental PH-V 22	México, Durango: Pueblo Nuevo, Comunidad Lajas, La Ventana	22		497940	2566006
S. González and S. Simental PH-V 25	México, Durango: Pueblo Nuevo, Comunidad Lajas, La Ventana	25		497905	2565984
S. González and S. Simental PH-V 28	México, Durango: Pueblo Nuevo, Comunidad Lajas, La Ventana	28	only cone	497942	2565940
S. González and S. Simental PH-V 31	México, Durango: Pueblo Nuevo, Comunidad Lajas, La Ventana	31		497970	2565961
S. González and S. Simental PH-V 34	México, Durango: Pueblo Nuevo, Comunidad Lajas, La Ventana	34		497984	2565983
S. González and S. Simental PH-V 37	México, Durango: Pueblo Nuevo, Comunidad Lajas, La Ventana	37		498013	2566028
S. González and S. Simental PH-V 40	México, Durango: Pueblo Nuevo, Comunidad Lajas, La Ventana	40		497983	2566029
S. González and S. Simental PH-V 43	México, Durango: Pueblo Nuevo, Comunidad Lajas, La Ventana	43		497955	2566029
S. González and S. Simental PH-V 46	México, Durango: Pueblo Nuevo, Comunidad Lajas, La Ventana	46		498038	2566011
S. González and S. Simental PH-V 49	México, Durango: Pueblo Nuevo, Comunidad Lajas, La Ventana	49		498033	2565945
S. González and S. Simental PH-V 52	México, Durango: Pueblo Nuevo, Comunidad Lajas, La Ventana	52		497981	2565945
S. González and S. Simental PH-V 55	México, Durango: Pueblo Nuevo, Comunidad Lajas, La Ventana	55		497987	2565924
S. González and S. Simental PH-V 58	México, Durango: Pueblo Nuevo, Comunidad Lajas, La Ventana	58		497917	2565857
S. González and S. Simental PH-V 61	México, Durango: Pueblo Nuevo, Comunidad Lajas, La Ventana	61		497875	2565865
S. González and S. Simental PH-V 64	México, Durango: Pueblo Nuevo, Comunidad Lajas, La Ventana	64		497894	2565907
S. González and S. Simental PH-V 67	México, Durango: Pueblo Nuevo, Comunidad Lajas, La Ventana	67		497911	2565942
S. González and S. Simental PH-V 79	México, Durango: Pueblo Nuevo, Comunidad Lajas, La Ventana	79		497859	2565970
S. González and S. Simental PH-V 82	México, Durango: Pueblo Nuevo, Comunidad Lajas, La Ventana	82		497852	2565964
S. González and S. Simental PH-V 86	México, Durango: Pueblo Nuevo, Comunidad Lajas, La Ventana	86		497853	2565948
S. González and S. Simental PH-V 94	México, Durango: Pueblo Nuevo, Comunidad Lajas, La Ventana	94	only cone	497863	2565903
S. González and S. Simental PH-V 97	México, Durango: Pueblo Nuevo, Comunidad Lajas, La Ventana	97	only cone	497880	2565903
S. González and S. Simental PH-V 100	México, Durango: Pueblo Nuevo, Comunidad Lajas, La Ventana	100		497830	2565930
S. González and S. Simental PH-V 106	México, Durango: Pueblo Nuevo, Comunidad Lajas, La Ventana	106	only cone	497820	2565972
S. González and S. Simental PH-V 109	México, Durango: Pueblo Nuevo, Comunidad Lajas, La Ventana	109		497760	2565990
S. González and S. Simental PH-V 118	México, Durango: Pueblo Nuevo, Comunidad Lajas, La Ventana	118		498091	2566040
S. González and S. Simental PH-V 121	México, Durango: Pueblo Nuevo, Comunidad Lajas, La Ventana	121		498093	2565957
S. González and S. Simental PH-V 124	México, Durango: Pueblo Nuevo, Comunidad Lajas, La Ventana	124		498078	2565921
S. González and S. Simental PH-V 127	México, Durango: Pueblo Nuevo, Comunidad Lajas, La Ventana	127		497993	2565842
S. González and S. Simental PH-V 130	México, Durango: Pueblo Nuevo, Comunidad Lajas, La Ventana	130		498094	2565829
