# Supplementary material for: Tall Pinus luzmariae trees with genes from P. herrerae
Source: PeerJ. 2020 Feb 26;8:e8648. doi: 10.7717/peerj.8648 (PMC7049253; doi:10.7717/peerj.8648)
Supplement: Table S5 [file peerj-08-8648-s003.xlsx]

## Sheet: Table S5_P.luzmariae_Vouchers
Table S5	Pinus luzmariae seed stands (PL); PL-L=Laguna and PL-T=Tacuache
Vouchers Pinus luzmariae	Site	Tree number	Comments	W	N	UTM Zone 13 N
S. González and S. Simental PL-L 1	México, Durango: Pueblo Nuevo, Comunidad Lajas, La Laguna	1		487951	2562606
S. González and S. Simental PL-L 7	México, Durango: Pueblo Nuevo, Comunidad Lajas, La Laguna	7	only cone	487802	2562611
S. González and S. Simental PL-L 10	México, Durango: Pueblo Nuevo, Comunidad Lajas, La Laguna	10		487740	2562615
S. González and S. Simental PL-L 16	México, Durango: Pueblo Nuevo, Comunidad Lajas, La Laguna	16		487552	2562631
S. González and S. Simental PL-L 18	México, Durango: Pueblo Nuevo, Comunidad Lajas, La Laguna	18		487524	2562618
S. González and S. Simental PL-L 22	México, Durango: Pueblo Nuevo, Comunidad Lajas, La Laguna	22		487468	2562498
S. González and S. Simental PL-L 25	México, Durango: Pueblo Nuevo, Comunidad Lajas, La Laguna	25		487510	2562501
S. González and S. Simental PL-L 28	México, Durango: Pueblo Nuevo, Comunidad Lajas, La Laguna	28	only cone	487605	2562595
S. González and S. Simental PL-L 34	México, Durango: Pueblo Nuevo, Comunidad Lajas, La Laguna	34		487832	2562569
S. González and S. Simental PL-L 37	México, Durango: Pueblo Nuevo, Comunidad Lajas, La Laguna	37		487775	2562550
S. González and S. Simental PL-L 40	México, Durango: Pueblo Nuevo, Comunidad Lajas, La Laguna	40		487726	2562522
S. González and S. Simental PL-L 43	México, Durango: Pueblo Nuevo, Comunidad Lajas, La Laguna	43	only cone	487642	2562540
S. González and S. Simental PL-L 46	México, Durango: Pueblo Nuevo, Comunidad Lajas, La Laguna	46		487650	2562491
S. González and S. Simental PL-L 49	México, Durango: Pueblo Nuevo, Comunidad Lajas, La Laguna	49		487640	2562459
S. González and S. Simental PL-L 52	México, Durango: Pueblo Nuevo, Comunidad Lajas, La Laguna	52		487626	2562477
S. González and S. Simental PL-L 55	México, Durango: Pueblo Nuevo, Comunidad Lajas, La Laguna	55	only cone	487603	2562449
S. González and S. Simental PL-L 58	México, Durango: Pueblo Nuevo, Comunidad Lajas, La Laguna	58	only cone	487437	2562571
S. González and S. Simental PL-L 61	México, Durango: Pueblo Nuevo, Comunidad Lajas, La Laguna	61		487409	2562591
S. González and S. Simental PL-L 64	México, Durango: Pueblo Nuevo, Comunidad Lajas, La Laguna	64		487336	2562561
S. González and S. Simental PL-L 67	México, Durango: Pueblo Nuevo, Comunidad Lajas, La Laguna	67		487305	2562551
S. González and S. Simental PL-L 70	México, Durango: Pueblo Nuevo, Comunidad Lajas, La Laguna	70		487312	2562538
S. González and S. Simental PL-L 73	México, Durango: Pueblo Nuevo, Comunidad Lajas, La Laguna	73		487224	2562517
S. González and S. Simental PL-L 76	México, Durango: Pueblo Nuevo, Comunidad Lajas, La Laguna	76	only cone	487116	2562517
S. González and S. Simental PL-L 79	México, Durango: Pueblo Nuevo, Comunidad Lajas, La Laguna	79	only cone	487101	2562563
S. González and S. Simental PL-L 82	México, Durango: Pueblo Nuevo, Comunidad Lajas, La Laguna	82	only cone	487238	2562555
S. González and S. Simental PL-L 88	México, Durango: Pueblo Nuevo, Comunidad Lajas, La Laguna	88		487266	2562610
S. González and S. Simental PL-L 97	México, Durango: Pueblo Nuevo, Comunidad Lajas, La Laguna	97		487170	2562561
S. González and S. Simental PL-L 103	México, Durango: Pueblo Nuevo, Comunidad Lajas, La Laguna	103		486935	2562611
S. González and S. Simental PL-L 109	México, Durango: Pueblo Nuevo, Comunidad Lajas, La Laguna	109	only cone	486795	2562634
S. González and S. Simental PL-L 112	México, Durango: Pueblo Nuevo, Comunidad Lajas, La Laguna	112		486870	2562646
S. González and S. Simental PL-L 118	México, Durango: Pueblo Nuevo, Comunidad Lajas, La Laguna	118	only cone	486978	2562671
S. González and S. Simental PL-L 124	México, Durango: Pueblo Nuevo, Comunidad Lajas, La Laguna	121	only cone	486927	2562643
S. González and S. Simental PL-L 127	México, Durango: Pueblo Nuevo, Comunidad Lajas, La Laguna	127		487170	2562672
S. González and S. Simental PL-L 130	México, Durango: Pueblo Nuevo, Comunidad Lajas, La Laguna	130		487201	2562652
S. González and S. Simental PL-T 1	México, Durango: Pueblo Nuevo, Comunidad Lajas, Tacuache	1		485452	2563346
S. González and S. Simental PL-T 4	México, Durango: Pueblo Nuevo, Comunidad Lajas, Tacuache	4	only cone	485276	2563463
S. González and S. Simental PL-T 7	México, Durango: Pueblo Nuevo, Comunidad Lajas, Tacuache	7		485230	2563522
S. González and S. Simental PL-T 10	México, Durango: Pueblo Nuevo, Comunidad Lajas, Tacuache	10		485336	2563586
S. González and S. Simental PL-T 12	México, Durango: Pueblo Nuevo, Comunidad Lajas, Tacuache	12	only cone	485334	2563651
S. González and S. Simental PL-T 13	México, Durango: Pueblo Nuevo, Comunidad Lajas, Tacuache	13	only cone	485413	2563491
S. González and S. Simental PL-T 16	México, Durango: Pueblo Nuevo, Comunidad Lajas, Tacuache	16		485482	2563419
S. González and S. Simental PL-T 19	México, Durango: Pueblo Nuevo, Comunidad Lajas, Tacuache	19		485558	2563420
S. González and S. Simental PL-T 22	México, Durango: Pueblo Nuevo, Comunidad Lajas, Tacuache	22		485449	2563530
S. González and S. Simental PL-T 28	México, Durango: Pueblo Nuevo, Comunidad Lajas, Tacuache	25		485438	2563610
S. González and S. Simental PL-T 31	México, Durango: Pueblo Nuevo, Comunidad Lajas, Tacuache	28		485488	2563661
S. González and S. Simental PL-T 34	México, Durango: Pueblo Nuevo, Comunidad Lajas, Tacuache	31		485470	2563614
S. González and S. Simental PL-T 37	México, Durango: Pueblo Nuevo, Comunidad Lajas, Tacuache	37		485526	2563616
S. González and S. Simental PL-T 43	México, Durango: Pueblo Nuevo, Comunidad Lajas, Tacuache	43		485467	2563193
S. González and S. Simental PL-T 46	México, Durango: Pueblo Nuevo, Comunidad Lajas, Tacuache	46		485381	2563187
S. González and S. Simental PL-T 52	México, Durango: Pueblo Nuevo, Comunidad Lajas, Tacuache	52		485138	2563359
S. González and S. Simental PL-T 55	México, Durango: Pueblo Nuevo, Comunidad Lajas, Tacuache	55		485113	2563321
S. González and S. Simental PL-T 58	México, Durango: Pueblo Nuevo, Comunidad Lajas, Tacuache	58		485079	2563208
S. González and S. Simental PL-T 61	México, Durango: Pueblo Nuevo, Comunidad Lajas, Tacuache	61		484996	2563374
S. González and S. Simental PL-T 64	México, Durango: Pueblo Nuevo, Comunidad Lajas, Tacuache	64		485039	2563440
S. González and S. Simental PL-T 67	México, Durango: Pueblo Nuevo, Comunidad Lajas, Tacuache	67		485041	2563450
S. González and S. Simental PL-T 70	México, Durango: Pueblo Nuevo, Comunidad Lajas, Tacuache	70		485020	2563461
S. González and S. Simental PL-T 73	México, Durango: Pueblo Nuevo, Comunidad Lajas, Tacuache	73	only cones	485023	2563450
S. González and S. Simental PL-T 76	México, Durango: Pueblo Nuevo, Comunidad Lajas, Tacuache	76		484902	2563453
S. González and S. Simental PL-T 85	México, Durango: Pueblo Nuevo, Comunidad Lajas, Tacuache	85	only cones	484893	2563637
S. González and S. Simental PL-T 91	México, Durango: Pueblo Nuevo, Comunidad Lajas, Tacuache	91		484835	2563608
S. González and S. Simental PL-T 97	México, Durango: Pueblo Nuevo, Comunidad Lajas, Tacuache	97		484900	2563690
S. González and S. Simental PL-T 100	México, Durango: Pueblo Nuevo, Comunidad Lajas, Tacuache	100		484923	2563723
S. González and S. Simental PL-T 103	México, Durango: Pueblo Nuevo, Comunidad Lajas, Tacuache	103		484969	2563661
S. González and S. Simental PL-T 112	México, Durango: Pueblo Nuevo, Comunidad Lajas, Tacuache	112		485068	2563585
S. González and S. Simental PL-T 118	México, Durango: Pueblo Nuevo, Comunidad Lajas, Tacuache	118		485053	2563520
S. González and S. Simental PL-T 121	México, Durango: Pueblo Nuevo, Comunidad Lajas, Tacuache	121		485111	2563543
S. González and S. Simental PL-T 124	México, Durango: Pueblo Nuevo, Comunidad Lajas, Tacuache	124		485223	2563554
S. González and S. Simental PL-T 129	México, Durango: Pueblo Nuevo, Comunidad Lajas, Tacuache	129		485623	2563275
S. González and S. Simental PL-T 130	México, Durango: Pueblo Nuevo, Comunidad Lajas, Tacuache	130	only cones	485619	2563289
