# Supplementary material for: Tall Pinus luzmariae trees with genes from P. herrerae
Source: PeerJ. 2020 Feb 26;8:e8648. doi: 10.7717/peerj.8648 (PMC7049253; doi:10.7717/peerj.8648)
Supplement: Table S6 [file peerj-08-8648-s004.xlsx]

## Sheet: Table S6_cone_raw_data
Important cone traits		Pinus herrerae (PH) and Pinus luzmariae seed stands (PL); PH-A=Manchon del Abies, PH-V=Ventana, PL-L=Laguna and PL-T=Tacuache
Pop.	Sample No.	Cone shape	Cone width (cm)	Cone scale position	Cone scale length (cm)	Cone scale width (cm)	Apophysis width (mm)	Keel
PH-V	1	1	4.1	1	2	0.9	7	0
PH-V	4	1	2.9	1	1.5	0.7	5	0
PH-V	7	1	3.1	1	1.3	0.7	6	0
PH-V	10	1	3.2	1	1.2	0.7	4	1
PH-V	13	1	3.5	1	1.3	0.7	5	0
PH-V	19	1	3.9	2	1.6	0.6	5	1
PH-V	25	1	3.8	1	1.4	0.7	5	1
PH-V	28	1	4	1	2	0.8	5	0
PH-V	31	1	3	1	1.4	0.8	4	1
PH-V	34	1	3	1	1.5	0.7	5	1
PH-V	37	1	3.7	1	1.4	0.7	5	0
PH-V	40	1	3	2	1.1	0.6	4	0
PH-V	43	1	3.5	1	1.5	0.8	7	1
PH-V	46	1	3.8	1	1.5	0.8	5	0
PH-V	49	1	3.5	1	1.3	0.8	5	0
PH-V	52	1	3.1	1	1.3	0.6	4	1
PH-V	55	1	3.5	1	1.3	0.8	5	1
PH-V	58	1	3.4	1	1.5	0.8	6	1
PH-V	61	1	4	1	1.7	0.8	6	0
PH-V	64	1	3.3	1	1.3	0.8	5	1
PH-V	67	1	3.6	1	1.6	0.8	5	1
PH-V	79	1	3.5	1	1.4	0.7	6	1
PH-V	82	1	3.7	1	1.6	0.8	5	1
PH-V	86	1	3.3	1	1.3	0.6	5	0
PH-V	94	1	4.5	1	2	0.9	6	1
PH-V	97	1	3	1	1.4	0.7	5	0
PH-V	100	1	2.8	2	1.4	0.5	5	0
PH-V	106	1	3.3	1	1.3	0.7	4	1
PH-V	109	1	3.2	2	1.3	0.7	4	0
PH-V	118	1	2.7	1	1.2	0.6	3	0
PH-V	121	1	3.4	1	1.6	0.6	5	0
PH-V	124	1	3.2	1	1.8	0.8	7	0
PH-V	127	1	2.8	1	1.1	0.6	4	0
PH-V	130	1	3.6	1	1.6	0.7	6	0
PH-A	1	1	2.3	1	1.2	0.5	3	0
PH-A	4	1	3.7	1	1.6	0.8	6	0
PH-A	7	1	3	1	1.5	0.6	5	0
PH-A	10	1	2.8	1	1.2	0.6	4	0
PH-A	16	1	3.1	1	1.3	0.7	6	0
PH-A	22	1	3.5	1	1.7	0.7	5	0
PH-A	25	1	2.5	1	1.2	0.6	4	0
PH-A	31	1	3.2	1	1.1	0.6	4	0
PH-A	34	1	2.7	1	1.3	0.6	5	0
PH-A	37	1	3.3	1	1.3	0.6	5	0
PH-A	40	1	2.7	1	1.6	0.7	5	0
PH-A	43	1	3.3	1	1.5	0.7	5	1
PH-A	46	1	3	1	1.4	0.6	5	0
PH-A	49	1	3.1	1	1.5	0.6	4	0
PH-A	52	1	3	1	1.3	0.8	6	0
PH-A	55	1	3.2	1	1.5	0.6	5	0
PH-A	58	1	3.6	1	1.4	0.7	5	0
PH-A	64	1	3.7	1	1.4	0.7	5	1
PH-A	67	1	3.4	1	1.3	0.7	5	0
PH-A	70	1	3	1	1.4	0.7	5	0
PH-A	73	1	2.9	1	1.2	0.7	5	0
PH-A	76	1	2.8	1	1.5	0.7	5	1
PH-A	79	1	3	1	1.5	0.7	5	1
PH-A	88	1	3.3	1	1.7	0.8	6	1
PH-A	91	1	2.7	1	1.5	0.6	6	0
PH-A	94	1	3	1	1.4	0.6	5	0
PH-A	97	1	3.5	1	1.3	0.6	5	0
PH-A	100	1	2.8	1	1.5	0.6	6	0
PH-A	103	1	3.5	1	1.4	0.6	5.5	1
PH-A	106	1	4	1	1.6	0.7	6	1
PH-A	112	1	2.2	1	1.2	0.5	5	0
PH-A	118	1	2.2	1	1.1	0.6	4	0
PH-A	124	1	3.2	1	1.5	0.7	5	0
PH-A	127	1	2.8	1	1.2	0.6	4	0
PH-A	130	1	4.1	1	1.8	0.8	5.5	1
PL-T	4	2	6.2	2	2	1.1	6	1
PL-T	7	2	5.1	2	1.8	0.8	7	0
PL-T	12	2	5.4	2	2	1.1	6	1
PL-T	10	2	4.8	2	1.8	1	7	0
PL-T	13	2	4.9	2	1.9	1	6	0
PL-T	13	2	5.6	2	2	1	7	0
PL-T	16	2	4.2	2	1.9	0.9	6	1
PL-T	19	2	4.1	2	1.5	0.7	5	0
PL-T	22	2	5.2	2	2.1	1.2	9	1
PL-T	28	2	5.2	2	1.9	1	7	0
PL-T	31	2	4.5	2	1.7	1.1	7	0
PL-T	37	2	4.8	2	1.8	1	7	0
PL-T	43	2	5.2	2	1.7	0.8	6	0
PL-T	46	2	3.2	2	1.7	0.9	6	0
PL-T	52	2	4.8	2	2.1	0.9	8	1
PL-T	55	2	5.5	3	2.5	1	8	1
PL-T	58	2	4.5	2	1.8	0.8	6	0
PL-T	61	2	4.4	2	1.7	1.1	6	1
PL-T	64	2	4.3	2	2	1	6	1
PL-T	67	2	5	2	1.8	0.8	5	0
PL-T	70	2	4.5	2	1.9	1	8	1
PL-T	76	2	4.8	2	2	1	8	0
PL-T	85	2	4.7	2	2	0.9	6	1
PL-T	91	2	5.2	2	2	1	7	0
PL-T	97	2	3.2	2	1.2	0.7	6	0
PL-T	100	2	5.2	2	2.2	1.1	7	0
PL-T	103	2	5.2	2	1.7	0.8	8	0
PL-T	112	2	5.2	2	1.9	1	7	1
PL-T	124	2	5.7	2	2.1	1	8	1
PL-T	130	2	4.1	2	1.7	0.9	6	0
PL-T	193	2	5.4	2	2	1	8	1
PL-L	1	2	4.8	2	1.9	0.9	6	1
PL-L	7	2	5.1	2	1.8	0.9	6	1
PL-L	10	2	5	2	1.8	1.1	8	1
PL-L	16	2	3.4	1	1.4	0.8	6	0
PL-L	18	2	5	2	2	1	7	1
PL-L	22	2	5.5	2	1.9	0.8	6	1
PL-L	25	2	6.3	2	2.3	1	7	1
PL-L	28	2	5.3	2	2	1	7	1
PL-L	34	2	6	2	1.8	1	7	1
PL-L	40	2	5.1	2	1.9	1	6	0
PL-L	43	2	5	1	2	1	8	0
PL-L	46	2	4.5	2	1.8	1	7	0
PL-L	52	2	4.3	2	1.5	0.9	6	1
PL-L	55	2	4.4	2	1.6	0.9	6	1
PL-L	58	2	5.7	2	2.1	1.1	9	0
PL-L	61	2	4.3	2	1.6	1	6	0
PL-L	64	2	5.3	2	1.8	0.9	6	1
PL-L	67	2	5.5	2	2	1	6	1
PL-L	70	2	4.6	2	1.7	0.9	6	1
PL-L	76	2	5.2	2	1.9	0.9	8	1
PL-L	79	2	4.6	2	1.7	0.9	6	1
PL-L	82	2	4.7	2	1.6	1	6	0
PL-L	88	2	5.2	2	1.9	1	8	1
PL-L	97	2	4.8	2	1.6	0.9	6	0
PL-L	103	2	5.3	2	1.8	1	6	1
PL-L	109	2	5	2	1.7	1	8	0
PL-L	109	2	4.5	2	1.7	1	6	1
PL-L	118	2	6.5	2	2	1	7	0
PL-L	121	2	5.3	2	1.9	0.8	5	1
PL-L	127	2	5.2	2	1.9	1	7	0
PL-L	130	2	6	2	2.1	1	8	1
.
