# Supplementary material for: Tall Pinus luzmariae trees with genes from P. herrerae
Source: PeerJ. 2020 Feb 26;8:e8648. doi: 10.7717/peerj.8648 (PMC7049253; doi:10.7717/peerj.8648)
Supplement: Table S7 [file peerj-08-8648-s005.xlsx]

## Sheet: Table S7_Needle traits
Important needle traits		Pinus herrerae (PH) and Pinus luzmariae seed stands (PL); PH-A=Manchon del Abies, PH-V=Ventana, PL-L=Laguna and PL-T=Tacuache
Population	Sample no.	Leaf sheath length (cm)	Leaf sheath diameter (mm)	Needle number	Needle length (cm)	Needle width (mm)	Needle thickness (mm)	Stomata rows (dorsal face)	Stomata rows (ventral faces)
PH-V	1	1	1.3	3	15.1	0.9	0.2	7	3
PH-V	4	1.3	1.3	3	13.4	0.9	0.3	8	3
PH-V	7	1.36667	1.3	3	14.6667	0.866667	0.2	6	3
PH-V	10	1.16667	1	3	13.2	0.633333	0.133333	5.66667	3.33333
PH-V	13	1	1.2	3	12.1333	0.833333	0.233333	7	3.33333
PH-V	19	1.3	1.16667	3	12	0.7	0.2	6	3.66667
PH-V	22	1.03333	1.16667	3	11.4667	0.833333	0.233333	5.66667	3
PH-V	25	1.03333	1.26667	3	13	0.866667	0.266667	6	3
PH-V	31	0.8	1.2	3	8.6	0.8	0.1	7	4
PH-V	34	0.6	1	3	11.3	0.8	0.2	9	6
PH-V	37	1.1	1	3	14.15	0.75	0.2	8	4
PH-V	40	0.8	1.26667	3	10.7333	0.9	0.2	6.66667	3.33333
PH-V	43	0.9	1	3	11.3	0.733333	0.2	6.33333	3
PH-V	46	1.2	1.1	3	15.7	0.8	0.2	5	3
PH-V	49	1.03333	1.2	3	15.9	0.9	0.266667	7	3.33333
PH-V	52	1.3	1.03333	3	11.2667	0.666667	0.133333	5.33333	3
PH-V	55	1.3	1.16667	3	11.6333	0.733333	0.2	6	3
PH-V	58	0.933333	1.03333	3	10.8	0.733333	0.133333	5.66667	3.33333
PH-V	61	1.33333	1.03333	3	12.5333	0.766667	0.233333	6.66667	3.33333
PH-V	64	0.85	1.2	3	12.05	0.75	0.2	6	3
PH-V	67	0.933333	1.26667	3	11.6333	0.866667	0.2	6.66667	3
PH-V	79	0.833333	1.16667	3	10.1	0.733333	0.2	5.33333	3.66667
PH-V	82	5.56667	1	3	12.4	0.633333	0.133333	5.66667	3
PH-V	86	1.13333	1.23333	3	12.4333	0.866667	0.2	5.66667	3
PH-V	100	1.2	1.13333	3	12.2667	0.7	0.166667	6.66667	3
PH-V	109	1.26667	1	3	10.5333	0.633333	0.166667	6	3
PH-V	118	0.75	1.2	3	11.45	0.8	0.2	6.5	3
PH-V	121	1.06667	1	3	13.1	0.7	0.266667	4.33333	3.33333
PH-V	124	1.03333	1.33333	3	16.6	0.866667	0.233333	7.66667	3.66667
PH-V	127	1	1.2	3	13.4333	0.8	0.2	5.66667	3.66667
PH-V	130	1.2	1.4	3	14.4	1	0.2	9	3
PH-A	1	1.1	1.25	3	10.25	0.7	0.25	7	4.5
PH-A	4	0.9	1.2	3	13.1	0.85	0.25	7	3
PH-A	7	0.9	1.23333	3	11.7	0.833333	0.2	7.33333	3.66667
PH-A	10	0.7	1.3	3	11.3	0.9	0.2	7	4
PH-A	13	0.8	1.2	3	11.8	0.9	0.2	9	3
PH-A	16	0.966667	1.1	3	11.9333	0.633333	0.2	5.66667	3.33333
PH-A	22	1.3	1.2	3	13.4	0.9	0.2	9	3
PH-A	25	1.1	1.13333	3	12.4667	0.733333	0.2	6.33333	3
PH-A	34	0.933333	1	3	11.4667	0.633333	0.2	6	4
PH-A	37	0.733333	1.03333	3	9.76667	0.633333	0.2	5	4
PH-A	40	1.2	1.1	3	15.4333	0.733333	0.266667	5.66667	3.66667
PH-A	43	1.06667	1	3	12.4333	0.733333	0.2	6.66667	3
PH-A	46	0.8	1.25	3	12.1	0.85	0.25	7.5	3.5
PH-A	49	0.7	1.2	3	12.9	0.9	0.2	6	4
PH-A	52	0.9	1.23333	3	12.6	0.8	0.2	6.33333	3
PH-A	55	0.7	1.1	3	12.6	0.7	0.2	6	4
PH-A	58	0.85	1.2	3	11.05	0.8	0.2	6.5	3
PH-A	64	0.95	1.05	3	10.25	0.75	0.2	6.5	3.5
PH-A	67	1.03333	1.36667	3	9.93333	0.9	0.166667	7.66667	3
PH-A	70	0.733333	1	3	12.4667	0.666667	0.2	6	3.66667
PH-A	73	0.766667	1.1	3	7.5	0.666667	0.2	5.33333	3.33333
PH-A	76	0.966667	1.13333	3	13.8333	0.833333	0.166667	7	3.33333
PH-A	79	0.85	1.2	3	13.7	1	0.3	8	4
PH-A	88	1	1.1	3	10.65	0.8	0.2	7	4
PH-A	91	1.23333	1.13333	3	12.2	0.766667	0.266667	7	3
PH-A	94	0.866667	1.23333	3	13.1667	0.866667	0.2	6.33333	3
PH-A	97	0.7	1.2	3	12.4	0.7	0.2	6	3
PH-A	100	0.9	1.1	3	10.9	0.7	0.2	6	4
PH-A	103	0.9	1	3	10.8	0.633333	0.2	5.33333	3.66667
PH-A	106	0.8	1.13333	3	10	0.7	0.266667	7	3
PH-A	112	1.3	1.2	3	11.2	0.7	0.2	7	5
PH-A	118	0.8	1.16667	3	11.9667	0.766667	0.2	6.66667	3
PH-A	127	0.833333	1.16667	3	12.6333	0.733333	0.266667	6.33333	2.66667
PH-A	130	0.933333	1	3	10.8333	0.666667	0.2	7.33333	4
PL-T	10	2.3	1.9	3	18.6	1.2	0.5	11	6
PL-T	13	1.6	1.7	3.5	13.6	1	0.5	13	5
PL-T	28	1.8	1.7	3.5	21.5	1.1	0.4	10	6
PL-T	31	2	1.9	3	28.8	1.3	0.6	10	5
PL-T	34	2.1	1.5	3	24.6	1	0.5	12	6
PL-T	37	1.5	1.7	3	23	1.1	0.4	9	4
PL-T	43	1.3	1.6	3.5	12.1	1.1	0.5	11	5
PL-T	46	2.5	1.8	3.5	18.6	1.1	0.5	10	5
PL-T	67	1.9	1.8	3.5	21.5	1	0.6	10	5
PL-T	70	1.5	2	3	22	1.3	0.5	12	5
PL-T	85	1.5	1.8	3	25.8	1.1	0.6	10	5
PL-L	1	1.7	1.8	3.5	22.7	1	0.5	13	6
PL-L	18	1.7	1.8	3	11	0.9	0.4	12	7
PL-L	37	2	1.4	3	13.8	0.9	0.4	12	7
PL-L	49	2.4	1.7	3.5	21	1.1	0.5	12	6
PL-L	52	1.5	1.4	3.5	19.6	1	0.5	13	5
PL-L	70	1.5	1.7	3.5	23.2	0.9	0.4	10	5
PL-L	73	1.5	1.5	3	19.5	1.1	0.5	13	5
PL-L	88	1.6	1.7	3	23.5	1.1	0.5	10	6
PL-L	97	1.8	1.8	3	21	1.1	0.4	10	5
PL-L	109	1.8	1.5	3	17	1.1	0.5	12	6
PL-L	112	1.5	1.4	3	16.5	1	0.4	15	6
PL-L	127	3.2	1.7	3	20	1.1	0.5	12	5
PL-L	130	2	1.6	3	19.8	1.1	0.4	12	6
