# Supplementary material for: Tall Pinus luzmariae trees with genes from P. herrerae
Source: PeerJ. 2020 Feb 26;8:e8648. doi: 10.7717/peerj.8648 (PMC7049253; doi:10.7717/peerj.8648)
Supplement: Tables S1-S3 [file peerj-08-8648-s001.xlsx]

## Sheet: Table S1_AFLP_raw_data
Pinus herrerae (PH) and Pinus luzmariae seed stands (PL); PH-A=Manchon del Abies, PH-V=Ventana, PL-L=Laguna and PL-T=Tacuache
Species	Population	Tree number	locus 1	locus 2	locus 3	locus 4	locus 5	locus 6	locus 7	locus 8	locus 9	locus 10	locus 11	locus 12	locus 13	locus 14	locus 15	locus 16	locus 17	locus 18	locus 19	locus 20	locus 21	locus 22	locus 23	locus 24	locus 25	locus 26	locus 27	locus 28	locus 29	locus 30	locus 31	locus 32	locus 33	locus 34	locus 35	locus 36	locus 37	locus 38	locus 39	locus 40	locus 41	locus 42	locus 43	locus 44	locus 45	locus 46	locus 47
Pinus herrerae	PH-A	1	0	0	0	0	1	0	1	0	0	1	0	0	0	1	1	1	0	1	0	1	0	1	0	0	1	1	0	0	1	1	0	0	0	0	1	0	0	1	1	0	0	1	0	0	1	0	0
Pinus herrerae	PH-A	4	0	0	0	0	1	1	1	0	0	0	0	1	0	1	1	1	0	1	0	1	0	1	0	0	1	1	0	1	1	1	0	1	1	1	1	0	1	1	1	1	0	1	1	0	1	0	1
Pinus herrerae	PH-A	7	0	0	0	0	1	1	1	0	1	0	1	0	0	1	1	1	0	1	0	1	0	1	0	0	1	1	0	0	0	0	1	1	1	1	1	0	1	1	1	1	0	1	1	0	1	0	0
Pinus herrerae	PH-A	10	0	0	0	0	1	0	1	0	0	1	0	0	0	1	1	1	0	1	0	1	0	1	0	0	0	1	0	1	1	1	0	1	0	0	1	0	0	1	1	0	0	1	1	0	1	1	0
Pinus herrerae	PH-A	13	0	0	0	0	1	0	1	0	1	1	0	1	0	1	1	1	0	1	0	0	0	1	0	0	1	0	0	0	0	1	0	1	1	1	1	0	1	1	1	1	0	1	1	0	1	1	0
Pinus herrerae	PH-A	16	0	1	0	0	1	0	1	0	1	1	0	1	0	1	1	1	0	1	0	1	0	1	0	0	0	1	0	0	1	1	1	1	0	0	1	0	1	1	0	1	0	1	1	0	1	0	1
Pinus herrerae	PH-A	22	0	0	0	0	1	0	1	0	0	1	0	1	0	1	1	1	0	1	1	1	0	1	0	0	0	1	1	0	0	1	0	1	1	0	1	1	0	1	0	1	0	1	0	0	1	0	0
Pinus herrerae	PH-A	25	0	0	0	0	1	0	1	0	1	0	1	1	0	1	1	1	0	1	0	1	0	1	0	0	1	0	0	0	0	1	0	1	1	1	1	0	0	1	1	1	0	1	0	0	1	0	0
Pinus herrerae	PH-A	34	0	0	0	0	1	0	1	0	1	0	0	0	0	1	1	1	0	1	0	1	0	1	0	0	1	0	1	0	0	1	0	1	1	1	0	1	1	1	1	1	0	1	0	0	1	0	1
Pinus herrerae	PH-A	37	0	0	0	0	1	0	1	0	0	1	0	0	0	1	1	1	0	1	0	1	0	1	0	0	0	1	0	1	0	1	0	1	1	0	1	1	0	1	1	0	0	1	0	0	1	0	0
Pinus herrerae	PH-A	40	0	0	0	0	1	0	1	0	1	0	1	0	0	1	1	1	0	1	0	1	0	1	1	0	0	1	0	1	0	1	0	1	1	1	1	0	1	1	1	0	0	1	0	1	1	1	0
Pinus herrerae	PH-A	43	0	0	0	0	1	1	1	0	1	0	0	1	0	1	1	1	0	1	1	0	0	1	0	0	1	1	0	1	0	1	0	1	1	1	1	0	0	1	1	0	0	1	0	0	1	0	0
Pinus herrerae	PH-A	46	0	0	0	0	1	0	1	0	1	1	0	1	0	1	1	1	0	1	0	1	0	1	0	0	1	0	0	0	0	1	1	1	1	1	1	0	0	1	1	0	0	1	0	1	1	0	0
Pinus herrerae	PH-A	49	0	0	0	0	1	0	1	0	0	1	0	1	0	1	1	1	0	1	1	1	0	1	0	0	1	1	0	1	1	1	1	1	1	1	1	0	1	1	1	0	0	1	1	0	1	1	0
Pinus herrerae	PH-A	52	0	0	0	0	1	0	1	0	1	0	0	1	0	1	1	1	0	1	0	1	0	1	0	1	1	1	0	0	0	1	0	1	0	0	1	0	1	1	1	0	0	1	1	0	1	0	0
Pinus herrerae	PH-A	55	0	0	0	0	1	0	1	0	1	0	1	0	0	1	1	1	0	1	0	1	0	1	0	0	1	0	1	0	1	1	0	0	0	0	1	0	1	1	1	1	0	1	1	0	1	1	0
Pinus herrerae	PH-A	58	0	0	0	0	1	0	1	0	1	0	0	1	0	1	1	1	0	1	0	1	0	1	0	1	0	1	0	1	1	1	0	1	1	1	1	0	1	1	1	1	0	1	1	0	1	1	0
Pinus herrerae	PH-A	64	0	0	0	0	1	0	1	0	1	0	0	0	0	1	1	1	0	1	0	1	0	1	0	1	0	1	0	1	0	1	0	1	1	1	1	0	1	1	1	1	0	1	0	0	1	0	0
Pinus herrerae	PH-A	67	0	0	0	0	1	0	1	0	1	0	1	1	0	1	1	1	0	1	0	1	0	1	0	0	0	1	0	1	1	1	0	1	1	1	1	1	0	1	0	1	0	1	0	0	1	0	0
Pinus herrerae	PH-A	70	0	0	0	0	1	0	1	0	0	1	0	0	0	1	1	1	0	1	0	1	0	1	0	0	1	0	0	1	0	1	0	1	1	1	1	0	0	0	1	1	0	1	0	0	1	1	0
Pinus herrerae	PH-A	73	0	0	0	0	1	0	1	0	1	1	0	0	0	1	1	1	0	1	0	1	0	1	0	0	1	1	0	1	1	1	0	1	0	1	1	0	0	1	1	0	0	1	0	0	1	0	0
Pinus herrerae	PH-A	76	0	0	0	0	1	0	1	0	1	1	0	0	0	1	1	1	0	1	0	1	0	1	0	0	1	0	0	1	0	1	0	1	0	0	1	0	0	1	1	0	0	1	0	0	1	0	0
Pinus herrerae	PH-A	79	0	0	0	0	1	0	1	0	0	1	0	0	0	1	1	1	0	1	0	1	0	1	0	0	1	0	0	1	1	1	0	1	1	1	1	0	0	1	1	0	0	1	0	0	1	0	0
Pinus herrerae	PH-A	88	0	0	0	0	1	0	1	0	0	0	1	1	0	1	1	0	0	1	1	0	0	1	0	0	1	0	1	1	1	0	1	1	1	1	1	0	0	1	1	1	0	1	1	0	1	0	0
Pinus herrerae	PH-A	91	0	0	0	0	1	0	1	0	1	1	0	0	0	1	1	1	0	1	1	1	0	1	1	0	1	1	0	1	0	1	1	1	1	1	1	0	1	1	0	1	0	1	0	0	1	0	0
Pinus herrerae	PH-A	94	0	0	0	0	1	0	1	0	0	1	0	1	0	1	1	1	0	1	0	1	0	1	0	0	1	1	0	1	0	1	0	1	0	1	1	0	1	1	1	1	0	1	0	0	1	0	0
Pinus herrerae	PH-A	97	0	0	0	0	1	0	1	0	1	0	0	1	0	1	1	1	0	1	1	1	0	1	0	0	1	0	0	1	1	1	0	1	1	1	1	0	0	1	0	1	0	1	0	1	1	0	0
Pinus herrerae	PH-A	100	0	0	0	0	1	0	1	0	0	1	0	0	0	1	1	1	0	1	0	1	0	1	0	0	1	1	0	1	0	1	1	1	0	1	1	0	0	1	0	1	0	1	1	0	1	1	0
Pinus herrerae	PH-A	103	0	1	0	0	1	0	1	0	0	0	0	0	0	1	1	1	0	1	0	1	0	1	0	0	1	0	0	0	0	1	0	0	1	1	1	0	0	1	1	0	0	1	1	0	1	1	0
Pinus herrerae	PH-A	106	0	0	0	0	1	0	1	0	1	0	0	1	0	1	1	1	0	1	0	1	0	1	0	0	1	0	0	0	1	1	0	1	0	1	0	1	1	1	0	1	0	1	0	0	1	0	0
Pinus herrerae	PH-A	112	0	0	0	0	1	0	1	0	0	1	0	0	0	1	1	1	0	1	0	1	0	1	0	0	1	0	0	1	1	0	1	0	0	1	1	0	0	1	1	0	0	1	0	0	1	0	0
Pinus herrerae	PH-A	118	0	0	0	0	1	0	1	0	0	1	0	1	0	1	1	1	0	1	0	1	0	1	0	0	1	1	0	0	0	1	1	1	1	0	1	0	1	1	1	0	0	1	0	0	1	0	0
Pinus herrerae	PH-A	124	0	0	0	0	1	0	1	0	1	0	1	0	0	1	1	1	0	1	0	1	0	1	0	0	1	0	0	1	0	1	0	1	0	0	1	0	0	1	1	1	0	1	0	1	1	0	0
Pinus herrerae	PH-A	127	0	1	0	0	1	1	1	0	0	1	0	1	0	1	1	1	0	1	0	1	0	1	0	0	1	0	0	1	1	1	0	1	0	1	1	0	0	1	1	1	0	1	0	0	1	0	0
Pinus herrerae	PH-A	130	0	0	0	0	1	0	1	0	1	1	0	0	0	1	1	1	0	1	0	1	0	1	0	0	1	1	0	1	1	0	0	1	1	1	1	0	0	1	1	0	0	1	0	0	1	0	0
Pinus herrerae	PH-T	4	0	1	0	0	1	0	1	0	0	1	0	0	0	1	1	1	0	1	0	1	0	1	0	1	1	0	0	0	0	1	0	0	1	1	0	0	0	1	0	1	0	1	0	0	1	0	0
Pinus herrerae	PH-T	7	0	0	0	0	1	0	1	0	1	1	1	0	0	1	1	1	0	1	0	1	0	1	0	1	1	0	0	1	0	1	1	0	0	1	1	0	1	1	1	1	0	1	0	0	1	1	0
Pinus herrerae	PH-T	10	0	1	0	0	1	0	1	0	1	0	1	0	0	1	1	1	0	1	0	1	0	1	0	1	1	0	0	0	0	1	1	1	1	1	1	0	0	1	0	1	0	1	0	0	1	0	0
Pinus herrerae	PH-T	13	0	0	0	0	1	0	1	0	1	1	0	0	0	1	1	1	0	1	0	1	0	1	0	0	1	0	0	1	1	1	0	1	1	1	1	0	0	1	0	1	0	1	1	0	1	1	0
Pinus herrerae	PH-T	16	0	0	0	0	1	0	1	0	0	0	1	0	0	1	1	1	0	1	0	0	1	1	0	1	0	1	0	0	0	1	1	0	1	1	1	0	1	1	0	1	0	1	0	0	1	1	0
Pinus herrerae	PH-T	22	0	1	0	0	1	0	1	0	0	1	0	1	0	1	1	1	0	1	0	1	0	1	0	1	0	1	0	1	1	1	0	0	1	1	1	0	0	1	1	0	1	1	1	0	1	1	0
Pinus herrerae	PH-T	25	0	0	0	0	1	0	1	0	1	0	1	0	0	1	1	1	0	1	0	1	0	1	0	0	1	0	0	1	0	1	0	1	0	1	1	0	0	1	0	1	1	1	0	1	1	0	0
Pinus herrerae	PH-T	28	0	1	0	0	1	0	1	0	0	1	0	1	0	1	1	1	0	0	1	1	0	1	0	0	1	0	0	1	0	1	1	1	1	1	1	0	1	1	0	1	0	1	1	0	1	1	0
Pinus herrerae	PH-T	31	0	0	0	0	1	0	1	0	0	0	1	0	0	1	1	1	0	0	1	0	1	1	0	0	1	0	0	1	1	1	0	0	1	1	1	0	1	1	1	1	0	1	0	1	1	0	0
Pinus herrerae	PH-T	34	0	0	0	0	1	0	1	0	1	0	1	0	0	1	1	1	0	1	0	1	0	1	0	0	1	0	1	1	0	1	0	1	0	1	0	0	0	1	1	1	0	1	1	0	1	0	1
Pinus herrerae	PH-T	37	0	0	0	0	1	0	1	0	0	1	0	1	0	1	1	1	0	1	1	1	0	1	0	0	0	1	0	1	0	1	1	1	1	1	1	0	0	1	1	0	1	1	1	0	1	1	0
Pinus herrerae	PH-T	40	0	0	0	0	1	0	1	0	0	1	0	0	0	1	1	1	0	1	1	0	1	1	0	0	1	0	0	1	1	1	0	0	1	1	1	0	0	1	0	1	0	1	0	0	1	0	0
Pinus herrerae	PH-T	43	0	0	1	0	1	0	0	1	1	0	0	1	0	1	1	1	0	1	0	1	0	1	0	1	0	1	0	1	1	1	0	1	1	1	1	0	0	0	1	1	0	1	1	0	1	0	0
Pinus herrerae	PH-T	46	0	0	0	0	1	0	1	0	1	1	0	1	0	1	1	1	0	1	0	1	0	1	0	0	1	0	1	1	0	1	0	0	1	1	1	0	0	1	1	0	0	1	1	0	1	0	0
Pinus herrerae	PH-T	52	0	1	0	0	1	0	1	0	0	1	0	0	0	1	1	1	0	0	0	1	0	1	0	0	1	0	0	1	1	1	0	1	0	0	1	0	1	1	1	0	1	1	0	1	1	0	0
Pinus herrerae	PH-T	55	0	1	0	0	1	0	1	0	1	1	0	1	0	1	1	1	0	1	0	1	0	1	0	0	1	0	1	1	1	1	0	1	1	1	1	0	0	1	1	1	0	1	0	1	1	1	0
Pinus herrerae	PH-T	61	0	0	0	0	1	0	1	0	1	0	1	0	0	1	1	1	0	1	1	1	0	1	0	0	1	1	0	0	0	1	0	0	1	1	1	0	1	1	0	1	0	1	0	1	1	1	0
Pinus herrerae	PH-T	67	0	1	0	0	1	0	1	0	1	1	0	1	0	1	1	1	0	1	0	1	0	1	0	0	1	0	0	1	0	1	0	1	1	1	1	0	1	1	1	1	0	1	0	1	1	0	0
Pinus herrerae	PH-T	70	0	0	0	0	1	0	1	0	0	1	0	0	0	1	1	1	0	1	0	1	0	1	0	0	1	0	1	1	0	1	1	1	0	1	1	0	0	1	1	0	1	1	1	0	1	0	0
Pinus herrerae	PH-T	73	0	0	0	0	1	0	1	0	1	1	0	1	0	1	1	1	0	1	0	1	0	1	0	0	1	0	1	1	1	1	0	0	1	1	1	0	1	1	1	0	1	1	0	0	1	0	0
Pinus herrerae	PH-T	76	0	0	0	0	1	0	1	0	1	0	1	1	0	1	1	1	0	1	0	1	0	1	0	0	1	1	0	1	1	1	0	1	1	1	1	0	1	1	1	0	1	1	0	0	1	0	1
Pinus herrerae	PH-T	82	0	1	0	0	1	0	1	0	1	0	1	1	0	1	1	1	0	1	1	1	0	1	0	0	1	0	1	1	1	1	0	0	1	0	1	0	0	1	0	1	1	1	1	0	1	0	0
Pinus herrerae	PH-T	85	0	0	0	0	1	0	1	0	1	1	0	1	0	1	1	1	0	0	1	1	0	1	0	0	1	1	0	1	1	0	1	1	0	1	1	0	1	1	1	0	0	1	1	0	1	0	0
Pinus herrerae	PH-T	88	0	0	0	0	1	1	1	0	1	0	1	1	0	1	1	1	0	1	1	1	0	1	0	0	1	0	0	0	0	1	0	1	1	1	1	0	1	1	1	0	1	1	0	0	1	0	0
Pinus herrerae	PH-T	91	0	0	0	0	1	0	1	0	1	1	0	1	0	1	0	1	1	1	1	0	1	1	0	0	1	0	1	1	0	1	0	1	0	1	1	0	1	1	1	0	1	1	0	1	1	0	0
Pinus herrerae	PH-T	100	0	0	1	0	1	0	1	0	1	0	1	0	0	1	1	1	0	1	1	1	0	1	1	0	1	0	0	1	0	1	1	1	1	0	1	0	0	1	1	1	0	1	0	0	1	0	0
Pinus herrerae	PH-T	103	0	0	0	0	1	0	1	0	1	1	0	1	0	1	1	1	0	1	1	1	0	1	0	0	1	1	0	1	0	1	0	0	1	1	1	0	1	1	1	1	0	1	1	0	1	0	1
Pinus herrerae	PH-T	106	0	1	0	0	1	0	1	0	1	0	1	0	0	1	1	1	0	1	0	1	0	1	0	0	1	1	0	1	1	1	0	0	1	1	1	0	0	1	1	1	0	1	0	0	1	0	0
Pinus herrerae	PH-T	109	0	0	0	0	1	0	1	0	1	0	1	0	0	1	1	0	1	1	1	1	0	1	0	0	1	1	0	1	0	1	0	1	1	1	0	1	1	1	1	0	1	1	0	0	1	1	0
Pinus herrerae	PH-T	118	0	0	0	0	1	0	1	0	1	0	1	0	0	1	0	1	0	1	0	1	0	1	0	0	1	0	1	1	1	1	0	0	0	1	1	0	0	1	0	1	0	1	0	0	1	0	0
Pinus herrerae	PH-T	121	0	1	0	0	1	0	1	0	0	0	1	0	0	1	1	1	0	1	1	1	0	1	0	0	1	0	0	1	1	0	1	1	1	1	1	1	0	1	0	0	1	1	0	1	1	0	0
Pinus herrerae	PH-T	127	0	1	0	0	1	0	1	0	1	1	0	1	0	1	1	1	0	1	0	1	0	1	0	0	1	0	0	0	0	1	0	1	1	1	1	0	1	1	1	1	0	1	0	0	1	1	0
Pinus herrerae	PH-T	130	0	0	0	0	1	0	1	0	1	1	0	0	0	1	1	0	1	1	1	0	1	1	0	1	1	0	0	0	0	1	0	0	1	1	1	0	1	1	0	0	1	1	0	1	1	0	0
Pinus herrerae	PH-V	1	0	0	0	0	1	0	1	0	1	0	1	0	0	1	1	1	0	1	0	1	0	1	0	1	1	0	1	1	1	1	0	0	0	0	1	0	0	0	1	0	1	1	0	1	1	0	1
Pinus herrerae	PH-V	4	0	1	0	0	1	0	1	0	1	0	0	1	0	1	1	1	0	1	0	1	0	1	0	0	1	0	0	0	0	1	0	1	1	1	1	0	1	1	1	0	0	1	1	0	1	0	0
Pinus herrerae	PH-V	7	0	0	0	0	1	0	1	0	0	0	1	0	0	1	1	1	0	1	1	1	0	1	0	0	1	0	0	1	0	1	1	1	1	1	0	1	1	1	0	1	0	1	0	0	1	1	0
Pinus herrerae	PH-V	10	0	0	0	0	1	0	1	0	0	0	1	0	0	1	1	1	0	1	0	1	0	1	0	0	1	0	0	1	0	1	0	1	0	1	1	0	1	1	1	0	0	1	0	1	1	0	0
Pinus herrerae	PH-V	13	0	0	1	0	1	0	1	0	1	1	0	1	0	1	1	0	1	0	0	1	0	1	0	0	1	0	0	1	1	1	1	1	1	1	1	0	0	1	1	1	0	1	1	0	1	1	1
Pinus herrerae	PH-V	19	0	0	0	0	1	0	1	0	0	1	0	1	0	1	1	1	0	1	0	1	0	1	0	0	0	1	0	0	1	1	1	1	1	1	1	0	0	1	0	1	0	1	0	0	1	0	0
Pinus herrerae	PH-V	22	0	0	0	0	1	0	1	0	0	0	1	0	0	1	1	1	0	1	0	1	0	1	0	0	1	0	0	1	0	1	0	1	1	1	1	0	1	1	1	0	0	1	0	0	1	0	0
Pinus herrerae	PH-V	25	0	1	0	0	1	0	1	0	0	0	1	0	0	1	0	1	0	0	1	1	0	1	0	0	0	1	0	1	1	1	0	1	0	1	1	0	1	1	1	0	1	1	0	0	1	0	1
Pinus herrerae	PH-V	28	0	0	0	0	1	0	1	0	0	1	1	0	0	1	0	1	0	0	1	0	1	1	0	0	1	0	1	0	1	1	0	1	0	1	0	1	0	0	1	1	0	1	1	0	1	0	0
Pinus herrerae	PH-V	31	0	1	0	0	1	0	1	0	1	0	1	1	0	1	1	1	0	1	0	1	0	1	0	0	0	1	1	1	1	1	0	0	1	1	0	1	1	1	1	1	0	1	0	0	1	1	0
Pinus herrerae	PH-V	34	0	0	0	0	1	0	1	0	0	1	0	0	0	1	1	1	0	1	1	1	0	1	0	0	1	0	0	0	0	1	1	0	1	1	1	1	1	1	1	1	0	1	1	0	1	0	0
Pinus herrerae	PH-V	37	0	0	0	0	1	1	1	0	0	0	1	1	0	1	1	1	0	1	0	1	0	1	1	0	1	0	0	0	0	1	0	1	0	1	1	0	1	1	1	1	0	1	1	0	1	1	0
Pinus herrerae	PH-V	40	0	0	0	0	1	0	1	0	1	0	1	0	0	1	1	1	0	1	1	1	0	1	0	0	1	0	1	1	1	1	0	1	1	1	1	1	0	1	1	1	0	1	0	1	1	1	0
Pinus herrerae	PH-V	43	0	0	0	0	1	0	1	0	0	0	1	0	0	1	1	1	0	1	0	1	0	1	0	0	1	0	0	1	0	0	1	1	1	0	1	0	0	1	1	1	0	1	1	0	1	0	0
Pinus herrerae	PH-V	46	0	0	0	0	1	0	1	0	1	0	1	1	0	1	1	1	0	1	0	1	0	1	0	0	0	1	0	1	1	1	0	1	0	1	1	0	0	1	1	0	1	1	0	0	1	0	1
Pinus herrerae	PH-V	49	0	0	0	0	1	0	1	0	1	0	0	1	0	1	1	1	0	1	1	1	0	1	0	0	1	0	0	0	0	0	1	1	1	1	1	0	0	1	1	0	1	1	0	0	1	0	0
Pinus herrerae	PH-V	52	0	1	0	0	1	0	1	0	0	1	1	0	0	1	0	1	0	1	0	1	0	1	0	0	1	0	0	1	1	1	0	1	1	1	1	0	0	1	1	1	0	1	0	1	1	0	0
Pinus herrerae	PH-V	55	0	0	0	0	1	0	1	0	0	0	1	0	0	1	1	1	0	1	0	1	0	1	1	0	1	1	0	1	1	1	0	1	0	0	1	0	1	1	1	1	0	1	0	0	1	0	0
Pinus herrerae	PH-V	58	0	0	0	0	1	0	1	0	0	1	0	0	0	1	1	1	0	1	0	1	0	1	0	0	0	1	0	1	1	1	1	1	1	1	1	0	0	1	1	0	0	1	0	0	1	0	0
Pinus herrerae	PH-V	61	0	0	0	0	1	0	1	0	0	1	0	0	0	1	0	1	1	1	0	1	0	1	0	0	0	0	0	0	0	1	0	1	1	1	0	1	1	1	1	0	1	1	0	0	1	1	0
Pinus herrerae	PH-V	64	0	0	0	0	1	0	1	0	1	0	1	0	0	1	1	1	0	1	0	1	0	1	0	0	0	1	0	1	1	0	1	1	0	1	1	1	1	1	1	1	0	1	0	0	1	0	1
Pinus herrerae	PH-V	67	0	0	0	0	1	0	1	0	1	0	1	1	0	1	1	1	0	1	0	1	0	1	0	0	0	1	0	0	0	1	0	1	1	1	1	0	0	1	1	0	1	1	0	0	1	0	0
Pinus herrerae	PH-V	79	0	0	0	0	1	0	1	0	0	1	0	0	0	1	1	1	0	1	0	1	0	1	0	0	1	0	0	1	0	1	0	1	0	0	1	1	1	1	1	1	0	1	0	0	1	0	1
Pinus herrerae	PH-V	82	0	0	0	0	1	0	1	0	1	1	0	1	0	1	1	1	0	0	0	1	0	1	0	0	0	1	0	1	1	1	1	0	0	0	1	0	0	0	1	1	0	1	0	0	1	1	1
Pinus herrerae	PH-V	86	0	0	0	0	1	0	1	0	0	0	1	0	0	1	1	1	0	1	0	1	0	1	0	0	1	0	0	1	0	1	0	0	1	1	1	0	0	1	1	1	0	1	1	0	1	0	0
Pinus herrerae	PH-V	94	0	0	0	0	1	0	1	0	0	0	1	1	0	1	1	1	0	1	0	1	0	1	1	0	1	0	1	1	0	0	1	1	1	1	1	0	0	1	0	1	0	1	0	0	1	0	1
Pinus herrerae	PH-V	97	0	0	0	0	1	0	1	0	1	0	1	0	0	1	1	1	0	1	1	1	0	1	0	0	0	1	1	1	0	1	0	0	1	1	1	0	0	1	1	1	0	1	0	0	1	0	0
Pinus herrerae	PH-V	100	0	0	0	0	1	0	1	0	1	0	1	0	0	1	1	1	0	1	0	1	0	1	0	1	1	0	0	1	0	0	1	1	1	1	1	0	0	1	1	1	0	1	0	0	1	0	0
Pinus herrerae	PH-V	106	0	0	0	0	1	0	1	0	1	0	1	1	0	1	1	1	0	1	0	1	0	1	1	0	1	0	1	1	0	1	0	1	1	1	1	0	0	1	0	0	1	1	0	0	1	1	0
Pinus herrerae	PH-V	109	0	0	0	0	1	0	1	0	1	0	1	1	0	1	1	1	0	1	1	1	0	1	0	0	0	1	1	1	0	1	1	0	1	0	0	1	0	1	0	1	0	1	0	0	1	0	0
Pinus herrerae	PH-V	118	0	1	0	0	1	0	1	0	1	1	0	1	0	1	1	1	0	1	0	1	0	1	0	0	0	1	0	0	0	1	0	0	1	1	1	0	1	1	1	1	0	1	0	0	1	0	0
Pinus herrerae	PH-V	121	0	0	0	0	1	0	1	0	1	0	1	0	0	1	1	0	0	1	0	1	0	1	0	0	1	0	0	1	1	1	1	1	1	0	1	0	1	1	0	1	0	1	0	0	1	0	0
Pinus herrerae	PH-V	124	0	0	0	0	1	0	1	0	1	0	1	0	0	1	1	1	0	1	0	1	0	1	0	0	0	1	0	1	0	1	1	0	1	1	1	0	0	0	1	1	1	1	0	1	1	1	1
Pinus herrerae	PH-V	127	0	0	0	0	1	0	1	0	1	0	1	0	0	1	1	1	0	1	0	1	0	1	1	0	0	1	0	1	1	1	0	0	0	0	1	0	0	1	0	1	0	1	0	1	1	0	0
Pinus herrerae	PH-V	130	0	0	0	0	1	0	1	0	1	1	0	1	0	1	1	1	0	0	0	1	0	1	0	0	1	0	0	1	1	0	1	1	0	0	1	0	0	1	0	1	0	1	0	0	1	0	0
Pinus luzmariae	PL-L	1	0	0	0	0	1	0	1	0	1	1	0	1	0	1	1	1	0	1	0	1	0	1	1	0	1	0	1	0	1	1	1	1	0	0	1	0	0	1	1	0	1	1	0	0	1	0	0
Pinus luzmariae	PL-L	7	0	0	0	0	1	0	1	0	1	1	0	0	0	1	1	0	0	0	0	1	0	1	1	0	1	1	0	1	0	1	0	1	1	1	1	0	1	1	0	1	0	1	0	1	1	0	0
Pinus luzmariae	PL-L	10	0	0	0	0	1	1	0	0	1	1	0	1	0	1	1	1	0	1	0	0	1	1	0	0	0	1	1	0	0	1	1	0	0	1	1	1	0	0	1	1	0	1	1	0	1	0	0
Pinus luzmariae	PL-L	16	0	0	0	0	1	0	1	0	1	1	0	1	0	1	1	1	0	1	0	1	0	1	0	0	0	1	0	1	0	1	0	1	1	1	1	1	1	1	1	1	0	1	0	0	1	0	0
Pinus luzmariae	PL-L	18	0	1	0	0	1	1	0	0	1	0	1	1	0	1	1	1	0	1	0	1	0	1	1	0	1	0	1	1	0	1	1	1	1	1	1	0	0	1	1	1	0	1	1	0	1	0	0
Pinus luzmariae	PL-L	22	0	0	0	0	1	0	1	0	1	0	1	1	0	1	1	0	1	1	0	1	0	1	0	0	1	0	1	1	1	1	0	1	1	1	1	0	1	0	1	0	0	1	0	0	1	0	0
Pinus luzmariae	PL-L	25	0	0	0	0	1	1	0	0	1	0	1	0	0	1	1	1	0	1	0	1	0	1	0	0	0	1	0	0	0	1	1	1	0	1	1	0	0	0	1	0	0	1	0	0	1	0	0
Pinus luzmariae	PL-L	28	0	0	0	0	1	0	1	0	0	1	1	1	0	1	1	1	1	0	1	0	0	1	1	0	0	1	1	0	1	1	1	1	1	1	1	0	0	1	1	0	0	1	0	0	1	0	0
Pinus luzmariae	PL-L	34	0	0	0	0	1	0	1	0	0	0	1	1	0	1	0	1	0	1	0	0	0	1	1	0	0	1	1	1	1	1	0	1	0	1	1	0	1	1	1	0	0	1	0	0	1	0	0
Pinus luzmariae	PL-L	37	0	0	0	0	1	0	1	1	0	0	1	0	0	1	1	0	0	1	0	1	0	1	0	0	1	0	1	0	0	1	0	1	0	0	1	0	0	1	1	0	0	1	0	1	1	0	1
Pinus luzmariae	PL-L	40	0	0	0	0	1	1	0	1	1	0	1	1	0	1	0	0	1	0	0	1	0	1	0	0	1	0	0	1	0	1	0	1	0	0	1	0	1	0	1	0	0	1	0	1	1	0	0
Pinus luzmariae	PL-L	43	0	1	0	1	1	0	1	0	0	0	1	0	0	1	1	1	0	1	1	1	0	1	0	0	0	1	0	1	1	1	0	1	0	0	1	0	0	1	1	0	0	1	0	0	1	0	0
Pinus luzmariae	PL-L	46	0	0	0	0	1	0	1	1	1	0	1	1	0	1	1	0	0	0	1	1	0	1	1	0	1	0	1	0	1	1	0	0	1	1	1	0	0	1	0	0	1	1	0	0	1	0	0
Pinus luzmariae	PL-L	49	0	0	1	1	0	0	1	0	1	0	1	1	0	1	1	1	0	1	1	1	0	1	0	0	0	1	1	1	1	1	0	1	0	0	1	0	0	1	0	0	0	1	0	0	1	0	0
Pinus luzmariae	PL-L	52	0	0	0	0	1	0	1	0	1	1	0	0	0	1	1	1	0	1	0	0	0	1	0	0	0	1	0	1	0	1	0	1	0	0	1	0	0	1	0	0	1	1	0	0	1	0	0
Pinus luzmariae	PL-L	55	0	0	0	0	1	0	1	1	1	0	1	0	0	1	0	1	1	1	0	1	0	1	1	0	1	0	0	1	0	1	0	1	1	1	1	0	1	1	0	0	0	1	0	0	1	0	0
Pinus luzmariae	PL-L	58	0	1	0	0	1	0	1	0	1	0	1	1	0	1	1	1	0	1	1	1	0	1	0	0	1	0	1	1	0	1	1	1	1	1	0	1	1	1	0	0	0	1	0	0	1	0	0
Pinus luzmariae	PL-L	61	0	0	0	0	1	1	1	0	1	1	0	1	0	1	1	0	0	1	1	1	0	1	1	0	1	0	1	1	1	1	0	1	1	1	1	0	0	1	1	1	0	1	0	0	1	0	0
Pinus luzmariae	PL-L	64	0	0	0	0	1	0	1	0	1	1	0	0	0	1	1	0	0	1	1	1	0	1	0	0	1	0	1	1	0	1	0	1	0	1	1	0	1	1	0	1	0	1	0	0	1	0	0
Pinus luzmariae	PL-L	67	0	0	0	0	1	1	0	0	1	0	1	1	0	1	1	0	0	1	0	0	0	1	0	0	0	1	1	0	1	1	0	1	0	1	1	0	1	1	0	1	0	1	0	0	1	0	0
Pinus luzmariae	PL-L	70	0	0	0	0	1	0	1	0	1	1	0	0	0	1	1	1	0	1	0	1	0	1	1	0	0	1	0	1	0	1	1	1	1	1	1	1	0	0	1	0	1	1	0	0	1	0	0
Pinus luzmariae	PL-L	73	0	0	1	0	1	0	1	0	1	0	1	0	0	1	0	1	0	1	1	1	0	1	0	0	1	0	1	1	1	1	1	1	1	0	1	0	1	1	1	0	0	1	0	0	1	0	0
Pinus luzmariae	PL-L	76	0	0	0	0	1	0	1	0	1	0	1	1	0	1	1	1	0	1	0	0	0	1	0	0	1	0	1	1	0	1	1	1	0	1	1	0	0	0	1	0	0	1	0	0	1	0	0
Pinus luzmariae	PL-L	79	0	0	0	0	1	0	1	0	1	0	1	1	0	1	1	1	0	0	1	1	0	1	0	1	0	1	0	1	0	1	1	1	0	1	0	0	1	1	0	0	1	1	0	0	1	0	0
Pinus luzmariae	PL-L	82	0	0	0	0	1	1	0	1	0	0	1	1	0	1	0	1	0	1	0	1	0	1	0	0	0	1	1	1	0	1	1	1	0	0	1	0	1	0	1	0	0	1	0	0	1	0	0
Pinus luzmariae	PL-L	88	0	0	0	0	1	0	1	0	1	0	1	1	0	1	1	0	0	1	0	0	0	1	0	0	0	1	0	1	0	1	1	0	1	1	1	1	1	1	1	1	0	1	0	0	1	0	0
Pinus luzmariae	PL-L	97	0	1	0	0	1	1	0	1	1	0	1	1	0	1	1	1	0	1	1	1	0	1	0	1	0	1	1	0	0	1	1	1	0	1	1	0	1	0	1	0	0	1	0	0	1	0	0
Pinus luzmariae	PL-L	103	0	0	0	0	1	0	1	0	1	0	1	0	0	1	1	0	1	0	1	1	0	1	1	0	0	1	1	1	0	1	1	1	0	1	1	0	0	1	0	0	0	1	0	0	1	0	0
Pinus luzmariae	PL-L	106	0	0	0	0	1	0	1	0	1	1	0	1	0	1	1	1	0	1	0	1	0	1	0	0	1	1	0	1	0	1	0	1	1	1	1	0	1	1	1	0	0	1	0	0	1	0	0
Pinus luzmariae	PL-L	109	0	0	0	0	1	0	1	0	1	0	1	1	0	1	1	1	0	1	0	0	0	1	1	0	0	1	1	0	1	1	1	1	0	1	1	0	0	1	0	0	0	1	0	1	1	0	0
Pinus luzmariae	PL-L	112	0	0	0	0	1	1	0	0	1	0	1	0	0	1	0	1	0	1	1	1	0	1	0	0	0	1	1	1	1	1	1	1	1	1	1	0	0	1	1	0	0	1	0	0	1	0	0
Pinus luzmariae	PL-L	118	0	0	1	0	1	0	1	0	1	0	1	1	0	1	1	1	0	1	0	0	0	1	1	0	1	0	1	0	0	1	0	1	1	1	1	0	0	1	0	0	1	1	0	0	1	0	0
Pinus luzmariae	PL-L	121	0	0	0	0	1	0	1	0	1	0	1	0	0	1	1	1	0	1	0	1	0	1	1	0	1	0	0	1	1	1	0	0	1	1	1	0	1	0	1	0	0	1	1	0	1	0	1
Pinus luzmariae	PL-L	127	0	0	0	1	1	1	0	0	1	0	1	1	0	1	1	1	0	1	0	1	0	1	1	0	0	1	1	0	0	1	1	1	1	1	1	0	0	0	1	0	0	1	0	0	1	0	0
Pinus luzmariae	PL-L	130	0	0	0	0	1	0	1	0	1	0	1	1	0	1	1	1	1	0	1	0	0	1	0	0	0	1	0	1	0	1	0	1	1	1	1	0	0	1	0	0	1	1	0	0	1	0	0
Pinus luzmariae	PL-T	1	0	0	0	0	1	0	1	0	1	0	0	1	0	1	1	1	0	1	1	1	0	1	0	0	1	0	0	1	0	1	1	1	1	1	1	0	0	0	1	0	0	1	0	0	1	0	1
Pinus luzmariae	PL-T	4	0	0	0	0	1	0	1	0	1	1	0	0	0	1	1	0	0	1	1	1	0	1	0	0	1	1	1	0	1	0	0	1	1	1	1	0	1	1	1	1	0	1	0	0	1	0	0
Pinus luzmariae	PL-T	7	0	0	0	0	1	1	1	0	1	1	0	1	0	1	1	1	0	1	0	1	0	1	1	0	1	0	1	0	0	1	1	1	1	1	0	0	1	1	0	1	0	1	0	1	1	0	0
Pinus luzmariae	PL-T	10	0	0	0	0	1	0	1	0	1	0	1	0	0	1	1	0	0	1	1	1	0	1	1	0	0	1	0	1	1	1	0	1	0	0	1	0	0	0	1	1	0	1	0	0	1	0	0
Pinus luzmariae	PL-T	13	0	0	0	0	1	0	1	0	1	0	0	1	0	1	1	1	0	1	1	1	0	1	0	0	1	0	0	0	1	1	1	1	0	1	1	0	0	1	0	1	0	1	0	0	1	0	0
Pinus luzmariae	PL-T	16	0	0	0	0	1	0	1	0	1	1	0	1	0	1	1	1	0	1	1	1	0	1	0	0	0	1	0	1	1	1	0	1	1	1	1	0	0	0	0	1	0	1	0	1	1	0	0
Pinus luzmariae	PL-T	19	0	0	0	1	0	0	1	0	1	1	0	0	0	1	1	0	0	1	0	1	0	1	0	0	1	0	1	1	1	1	1	0	1	1	1	0	1	0	1	1	0	1	0	0	1	0	0
Pinus luzmariae	PL-T	22	0	0	0	0	1	0	1	0	1	0	0	0	0	1	1	0	0	1	1	1	0	1	0	0	1	0	0	0	0	1	0	1	0	0	1	0	1	1	0	1	0	1	0	1	1	0	0
Pinus luzmariae	PL-T	25	0	0	0	1	0	0	1	0	1	1	0	1	0	1	1	1	0	1	0	1	0	1	1	0	1	0	1	1	0	0	1	1	1	1	1	0	0	1	0	1	0	1	0	0	1	0	0
Pinus luzmariae	PL-T	28	0	0	0	0	1	0	1	0	1	0	0	0	0	1	1	0	0	1	0	1	0	1	0	0	1	0	1	1	1	0	1	1	1	1	0	1	0	1	1	0	1	1	0	0	1	0	0
Pinus luzmariae	PL-T	31	0	0	0	1	0	0	1	0	1	1	0	1	0	1	1	1	0	1	0	1	0	1	1	0	1	0	1	0	0	1	1	1	0	0	1	0	0	1	0	1	0	1	0	0	1	0	0
Pinus luzmariae	PL-T	37	0	0	0	1	0	0	1	0	1	1	0	0	0	1	1	1	0	1	0	1	0	1	0	0	0	1	0	1	1	0	1	1	1	0	0	1	1	1	1	0	0	1	0	0	1	0	0
Pinus luzmariae	PL-T	43	0	1	0	0	1	0	1	0	1	0	1	1	0	1	1	1	0	1	0	0	0	1	1	0	1	0	0	0	0	1	1	1	1	1	1	0	0	0	1	1	0	1	0	0	1	0	0
Pinus luzmariae	PL-T	46	0	0	0	0	1	0	1	0	1	0	0	0	0	1	1	1	0	1	0	1	0	1	1	0	1	1	0	1	0	1	1	1	1	1	1	0	1	1	1	0	1	1	0	0	1	0	0
Pinus luzmariae	PL-T	52	0	0	0	1	0	0	1	0	1	0	0	1	0	1	1	0	0	1	0	1	0	1	0	1	0	1	0	1	1	0	1	1	1	1	1	0	0	1	1	1	0	1	0	0	1	0	0
Pinus luzmariae	PL-T	55	0	0	0	0	1	0	1	0	1	0	0	0	0	1	1	0	0	1	0	1	0	1	0	0	0	1	1	1	0	1	1	1	0	1	0	1	1	1	1	0	0	1	0	0	1	0	0
Pinus luzmariae	PL-T	58	0	0	0	0	1	0	1	0	1	1	0	1	0	1	1	0	0	1	0	1	0	1	0	0	0	1	0	1	1	1	1	1	1	0	1	1	1	1	1	0	0	1	0	0	1	0	0
Pinus luzmariae	PL-T	61	0	0	0	0	1	0	1	0	1	0	1	0	0	1	1	1	0	1	0	1	0	1	0	0	0	1	1	1	0	1	0	1	0	1	1	0	1	1	0	1	0	1	0	1	1	0	0
Pinus luzmariae	PL-T	64	0	0	1	0	1	0	1	0	1	1	0	0	0	1	1	1	1	1	0	1	0	1	1	0	1	0	1	1	0	1	1	1	0	1	1	0	1	1	1	1	0	1	0	0	1	0	0
Pinus luzmariae	PL-T	67	0	0	0	1	0	0	1	0	1	1	0	1	0	1	1	0	0	1	0	1	0	1	1	0	0	1	1	1	0	0	1	1	1	1	1	0	0	1	0	1	0	1	0	0	1	0	0
Pinus luzmariae	PL-T	70	0	0	0	0	1	0	1	0	1	0	1	0	0	1	1	0	0	1	0	1	0	1	1	0	0	1	0	0	0	1	1	1	1	0	1	0	1	1	0	1	0	1	0	0	1	0	0
Pinus luzmariae	PL-T	73	0	1	0	0	1	0	1	0	1	0	1	0	0	1	1	0	0	1	0	1	0	1	1	0	0	1	1	0	1	1	1	1	1	1	1	0	1	0	1	0	0	1	0	0	1	0	0
Pinus luzmariae	PL-T	76	0	0	0	0	1	0	1	0	1	1	0	0	0	1	1	0	0	1	1	1	0	1	1	1	0	1	1	1	0	1	1	1	1	0	1	0	0	1	1	1	0	1	0	0	1	0	0
Pinus luzmariae	PL-T	85	0	0	0	1	0	0	1	0	1	1	0	0	0	1	1	1	0	1	0	1	0	1	0	0	1	0	0	1	1	0	1	1	1	1	1	0	1	1	1	0	0	1	0	1	1	0	0
Pinus luzmariae	PL-T	91	0	0	0	0	1	0	1	0	1	0	0	0	0	1	1	1	0	1	0	1	0	1	1	0	1	0	0	1	0	1	0	1	1	1	1	0	0	1	1	0	0	1	0	0	1	0	0
Pinus luzmariae	PL-T	97	0	0	0	0	1	0	1	0	1	1	0	0	0	1	0	1	0	1	0	1	0	1	0	0	0	1	1	1	1	0	1	1	1	1	1	0	1	1	1	1	1	0	0	1	1	0	0
Pinus luzmariae	PL-T	100	0	0	0	0	1	1	1	0	1	1	0	1	0	1	1	1	0	1	1	1	0	1	0	0	1	0	1	1	1	1	0	1	1	1	1	0	1	0	1	0	1	1	1	0	1	0	0
Pinus luzmariae	PL-T	103	0	0	0	0	1	0	1	0	1	0	1	1	0	1	1	0	0	1	1	1	0	1	1	0	0	1	0	0	1	0	1	0	1	1	1	0	0	0	1	1	0	1	0	0	1	0	0
Pinus luzmariae	PL-T	112	0	0	0	0	1	0	1	0	1	0	0	1	0	1	1	1	0	1	0	1	0	1	0	0	0	1	0	1	1	1	1	1	0	1	1	0	1	1	0	0	1	1	0	0	1	0	0
Pinus luzmariae	PL-T	118	0	0	0	0	1	0	1	0	1	0	1	0	0	1	1	0	1	1	0	1	0	1	0	0	0	1	0	1	0	1	1	0	1	0	1	0	0	1	1	1	0	1	0	0	1	0	0
Pinus luzmariae	PL-T	121	0	0	0	0	1	0	1	0	1	1	0	0	0	1	1	1	0	1	0	1	0	1	0	0	1	0	1	1	0	1	0	1	0	1	1	1	1	1	1	1	0	1	0	0	1	0	0
Pinus luzmariae	PL-T	124	0	0	0	0	1	0	1	0	1	1	0	1	0	1	1	0	0	1	1	1	0	1	0	0	0	1	1	1	0	1	1	1	1	1	0	0	0	1	0	1	0	1	0	1	1	0	0
Pinus luzmariae	PL-T	130	0	0	0	1	0	0	1	0	1	0	0	1	0	1	1	1	0	1	0	1	0	1	0	0	0	1	0	1	1	1	0	1	0	1	1	0	1	1	1	1	0	1	0	0	1	0	0
[truncated: 328 more columns]

## Sheet: Table S2_Results_STRUCTURE_2.1
Species	Population	Tree number	P pure PH	P pure PL		P = membership probabilities of individuals to a species
Pinus herrerae	PH-A	1	0.686	0.314
Pinus herrerae	PH-A	4	0.684	0.316		Pinus herrerae (PH) and Pinus luzmariae seed stands (PL); PH-A=Manchon del Abies, PH-V=Ventana, PL-L=Laguna and PL-T=Tacuache
Pinus herrerae	PH-A	7	0.774	0.226
Pinus herrerae	PH-A	10	0.558	0.442
Pinus herrerae	PH-A	13	0.597	0.403
Pinus herrerae	PH-A	16	0.904	0.096
Pinus herrerae	PH-A	22	0.588	0.412
Pinus herrerae	PH-A	25	0.674	0.326
Pinus herrerae	PH-A	34	0.336	0.664
Pinus herrerae	PH-A	37	0.615	0.385
Pinus herrerae	PH-A	40	0.661	0.339
Pinus herrerae	PH-A	43	0.65	0.35
Pinus herrerae	PH-A	46	0.911	0.089
Pinus herrerae	PH-A	49	0.783	0.217
Pinus herrerae	PH-A	52	0.619	0.381
Pinus herrerae	PH-A	55	0.792	0.208
Pinus herrerae	PH-A	58	0.571	0.429
Pinus herrerae	PH-A	64	0.66	0.34
Pinus herrerae	PH-A	67	0.638	0.362
Pinus herrerae	PH-A	70	0.519	0.481
Pinus herrerae	PH-A	73	0.55	0.45
Pinus herrerae	PH-A	76	0.893	0.107
Pinus herrerae	PH-A	79	0.584	0.416
Pinus herrerae	PH-A	88	0.525	0.475
Pinus herrerae	PH-A	91	0.5	0.5
Pinus herrerae	PH-A	94	0.612	0.388
Pinus herrerae	PH-A	97	0.636	0.364
Pinus herrerae	PH-A	100	0.859	0.141
Pinus herrerae	PH-A	103	0.717	0.283
Pinus herrerae	PH-A	106	0.62	0.38
Pinus herrerae	PH-A	112	0.635	0.365
Pinus herrerae	PH-A	118	0.636	0.364
Pinus herrerae	PH-A	124	0.711	0.289
Pinus herrerae	PH-A	127	0.829	0.171
Pinus herrerae	PH-A	130	0.693	0.307
Pinus herrerae	PH-R	4	0.982	0.018
Pinus herrerae	PH-R	7	0.976	0.024
Pinus herrerae	PH-R	10	0.993	0.007
Pinus herrerae	PH-R	13	0.88	0.12
Pinus herrerae	PH-R	16	0.989	0.011
Pinus herrerae	PH-R	22	0.988	0.012
Pinus herrerae	PH-R	25	0.965	0.035
Pinus herrerae	PH-R	28	0.977	0.023
Pinus herrerae	PH-R	31	0.963	0.037
Pinus herrerae	PH-R	34	0.991	0.009
Pinus herrerae	PH-R	37	0.94	0.06
Pinus herrerae	PH-R	40	0.995	0.005
Pinus herrerae	PH-R	43	0.961	0.039
Pinus herrerae	PH-R	46	0.957	0.043
Pinus herrerae	PH-R	52	0.951	0.049
Pinus herrerae	PH-R	55	0.99	0.01
Pinus herrerae	PH-R	61	0.927	0.073
Pinus herrerae	PH-R	67	0.873	0.127
Pinus herrerae	PH-R	70	0.844	0.156
Pinus herrerae	PH-R	73	0.955	0.045
Pinus herrerae	PH-R	76	0.962	0.038
Pinus herrerae	PH-R	82	0.978	0.022
Pinus herrerae	PH-R	85	0.977	0.023
Pinus herrerae	PH-R	88	0.985	0.015
Pinus herrerae	PH-R	91	0.98	0.02
Pinus herrerae	PH-R	100	0.993	0.007
Pinus herrerae	PH-R	103	0.981	0.019
Pinus herrerae	PH-R	106	0.993	0.007
Pinus herrerae	PH-R	109	0.951	0.049
Pinus herrerae	PH-R	118	0.984	0.016
Pinus herrerae	PH-R	121	0.987	0.013
Pinus herrerae	PH-R	127	0.985	0.015
Pinus herrerae	PH-R	130	0.993	0.007
Pinus herrerae	PH-V	1	0.956	0.044
Pinus herrerae	PH-V	4	0.996	0.004
Pinus herrerae	PH-V	7	0.904	0.096
Pinus herrerae	PH-V	10	0.986	0.014
Pinus herrerae	PH-V	13	0.899	0.101
Pinus herrerae	PH-V	19	0.928	0.072
Pinus herrerae	PH-V	22	0.698	0.302
Pinus herrerae	PH-V	25	0.784	0.216
Pinus herrerae	PH-V	28	0.306	0.694
Pinus herrerae	PH-V	31	0.954	0.046
Pinus herrerae	PH-V	34	0.985	0.015
Pinus herrerae	PH-V	37	0.981	0.019
Pinus herrerae	PH-V	40	0.971	0.029
Pinus herrerae	PH-V	43	0.858	0.142
Pinus herrerae	PH-V	46	0.866	0.134
Pinus herrerae	PH-V	49	0.993	0.007
Pinus herrerae	PH-V	52	0.996	0.004
Pinus herrerae	PH-V	55	0.963	0.037
Pinus herrerae	PH-V	58	0.988	0.012
Pinus herrerae	PH-V	61	0.964	0.036
Pinus herrerae	PH-V	64	0.995	0.005
Pinus herrerae	PH-V	67	0.976	0.024
Pinus herrerae	PH-V	79	0.982	0.018
Pinus herrerae	PH-V	82	0.976	0.024
Pinus herrerae	PH-V	86	0.988	0.012
Pinus herrerae	PH-V	94	0.786	0.214
Pinus herrerae	PH-V	97	0.971	0.029
Pinus herrerae	PH-V	100	0.923	0.077
Pinus herrerae	PH-V	106	0.873	0.127
Pinus herrerae	PH-V	109	0.993	0.007
Pinus herrerae	PH-V	118	0.984	0.016
Pinus herrerae	PH-V	121	0.784	0.216
Pinus herrerae	PH-V	124	0.933	0.067
Pinus herrerae	PH-V	127	0.99	0.01
Pinus herrerae	PH-V	130	0.946	0.054
Pinus luzmariae	PL-L	1	0.223	0.777
Pinus luzmariae	PL-L	7	0.045	0.955
Pinus luzmariae	PL-L	10	0.3	0.7
Pinus luzmariae	PL-L	16	0.059	0.941
Pinus luzmariae	PL-L	18	0.115	0.885
Pinus luzmariae	PL-L	22	0.226	0.774
Pinus luzmariae	PL-L	25	0.415	0.585
Pinus luzmariae	PL-L	28	0.413	0.587
Pinus luzmariae	PL-L	34	0.374	0.626
Pinus luzmariae	PL-L	37	0.265	0.735
Pinus luzmariae	PL-L	40	0.224	0.776
Pinus luzmariae	PL-L	43	0.442	0.558
Pinus luzmariae	PL-L	46	0.159	0.841
Pinus luzmariae	PL-L	49	0.283	0.717
Pinus luzmariae	PL-L	52	0.415	0.585
Pinus luzmariae	PL-L	55	0.126	0.874
Pinus luzmariae	PL-L	58	0.272	0.728
Pinus luzmariae	PL-L	61	0.031	0.969
Pinus luzmariae	PL-L	64	0.008	0.992
Pinus luzmariae	PL-L	67	0.005	0.995
Pinus luzmariae	PL-L	70	0.31	0.69
Pinus luzmariae	PL-L	73	0.255	0.745
Pinus luzmariae	PL-L	76	0.033	0.967
Pinus luzmariae	PL-L	79	0.233	0.767
Pinus luzmariae	PL-L	82	0.283	0.717
Pinus luzmariae	PL-L	88	0.387	0.613
Pinus luzmariae	PL-L	97	0.459	0.541
Pinus luzmariae	PL-L	103	0.434	0.566
Pinus luzmariae	PL-L	106	0.096	0.904
Pinus luzmariae	PL-L	109	0.247	0.753
Pinus luzmariae	PL-L	112	0.292	0.708
Pinus luzmariae	PL-L	118	0.398	0.602
Pinus luzmariae	PL-L	121	0.281	0.719
Pinus luzmariae	PL-L	127	0.28	0.72
Pinus luzmariae	PL-L	130	0.515	0.485
Pinus luzmariae	PL-T	1	0.006	0.994
Pinus luzmariae	PL-T	4	0.053	0.947
Pinus luzmariae	PL-T	7	0.016	0.984
Pinus luzmariae	PL-T	10	0.024	0.976
Pinus luzmariae	PL-T	13	0.012	0.988
Pinus luzmariae	PL-T	16	0.125	0.875
Pinus luzmariae	PL-T	19	0.026	0.974
Pinus luzmariae	PL-T	22	0.013	0.987
Pinus luzmariae	PL-T	25	0.018	0.982
Pinus luzmariae	PL-T	28	0.009	0.991
Pinus luzmariae	PL-T	31	0.009	0.991
Pinus luzmariae	PL-T	37	0.005	0.995
Pinus luzmariae	PL-T	43	0.038	0.962
Pinus luzmariae	PL-T	46	0.025	0.975
Pinus luzmariae	PL-T	52	0.019	0.981
Pinus luzmariae	PL-T	55	0.011	0.989
Pinus luzmariae	PL-T	58	0.013	0.987
Pinus luzmariae	PL-T	61	0.06	0.94
Pinus luzmariae	PL-T	64	0.169	0.831
Pinus luzmariae	PL-T	67	0.01	0.99
Pinus luzmariae	PL-T	70	0.051	0.949
Pinus luzmariae	PL-T	73	0.005	0.995
Pinus luzmariae	PL-T	76	0.05	0.95
Pinus luzmariae	PL-T	85	0.016	0.984
Pinus luzmariae	PL-T	91	0.016	0.984
Pinus luzmariae	PL-T	97	0.024	0.976
Pinus luzmariae	PL-T	100	0.144	0.856
Pinus luzmariae	PL-T	103	0.004	0.996
Pinus luzmariae	PL-T	112	0.013	0.987
Pinus luzmariae	PL-T	118	0.097	0.903
Pinus luzmariae	PL-T	121	0.036	0.964
Pinus luzmariae	PL-T	124	0.021	0.979
Pinus luzmariae	PL-T	130	0.009	0.991

## Sheet: Table S3_Results_NewHybrids_1.1
Species	Population	Tree number	P pure PH	P pure PL	Hybrid F1	Hybrid F2	first backcross generation to PH	first backcross generation to PL		P = membership probabilities of individuals to a species
Pinus herrerae	PH-A	1	0.99382	0	0	1e-05	0.00617	0
Pinus herrerae	PH-A	4	0.99254	0	0	1e-05	0.00745	0		Pinus herrerae (PH) and Pinus luzmariae seed stands (PL); PH-A=Manchon del Abies, PH-V=Ventana, PL-L=Laguna and PL-T=Tacuache
Pinus herrerae	PH-A	7	0.99604	0	0	1e-05	0.00395	0
Pinus herrerae	PH-A	10	0.85581	0	0.00121	0.01639	0.12645	0.00014
Pinus herrerae	PH-A	13	0.96055	0	0.00011	0.00057	0.03877	0
Pinus herrerae	PH-A	16	0.99986	0	0	0	0.00014	0
Pinus herrerae	PH-A	22	0.92332	0	0.00012	0.00087	0.0757	0
Pinus herrerae	PH-A	25	0.99237	0	0	4e-05	0.00758	0
Pinus herrerae	PH-A	34	1e-05	0.0002	0.00827	0.27267	0.0035	0.71535
Pinus herrerae	PH-A	37	0.97044	0	2e-05	0.00058	0.02896	0
Pinus herrerae	PH-A	40	0.99024	0	1e-05	1e-05	0.00975	0
Pinus herrerae	PH-A	43	0.98931	0	2e-05	0.00013	0.01053	0
Pinus herrerae	PH-A	46	0.99989	0	0	0	0.00011	0
Pinus herrerae	PH-A	49	0.99752	0	0	0	0.00248	0
Pinus herrerae	PH-A	52	0.98091	0	6e-05	0.0004	0.01863	0
Pinus herrerae	PH-A	55	0.99842	0	0	0	0.00158	0
Pinus herrerae	PH-A	58	0.87819	0	0.00153	0.00213	0.11814	0
Pinus herrerae	PH-A	64	0.98977	0	1e-05	2e-05	0.0102	0
Pinus herrerae	PH-A	67	0.98595	0	3e-05	0.00012	0.01391	0
Pinus herrerae	PH-A	70	0.59593	0	0.00836	0.05841	0.3369	0.0004
Pinus herrerae	PH-A	73	0.84756	0	0.0021	0.00211	0.14823	0
Pinus herrerae	PH-A	76	0.99941	0	0	0	0.00058	0
Pinus herrerae	PH-A	79	0.90106	0	0.00095	0.01336	0.08442	0.0002
Pinus herrerae	PH-A	88	0.7973	0	0.00165	0.01901	0.18192	0.00012
Pinus herrerae	PH-A	91	0.43855	0	0.01789	0.09824	0.44449	0.00084
Pinus herrerae	PH-A	94	0.96371	0	2e-05	0.00018	0.0361	0
Pinus herrerae	PH-A	97	0.98336	0	3e-05	7e-05	0.01655	0
Pinus herrerae	PH-A	100	0.99938	0	0	0	0.00062	0
Pinus herrerae	PH-A	103	0.99576	0	0	0	0.00424	0
Pinus herrerae	PH-A	106	0.98155	0	1e-05	4e-05	0.0184	0
Pinus herrerae	PH-A	112	0.98303	0	1e-05	0.00012	0.01683	0
Pinus herrerae	PH-A	118	0.98504	0	2e-05	7e-05	0.01488	0
Pinus herrerae	PH-A	124	0.99561	0	0	2e-05	0.00437	0
Pinus herrerae	PH-A	127	0.99919	0	0	0	0.00081	0
Pinus herrerae	PH-A	130	0.99387	0	0	1e-05	0.00612	0
Pinus herrerae	PH-R	4	0.99991	0	0	0	9e-05	0
Pinus herrerae	PH-R	7	0.99974	0	0	0	0.00026	0
Pinus herrerae	PH-R	10	0.99998	0	0	0	2e-05	0
Pinus herrerae	PH-R	13	0.99483	0	0	0	0.00517	0
Pinus herrerae	PH-R	16	0.99997	0	0	0	3e-05	0
Pinus herrerae	PH-R	22	0.99996	0	0	0	4e-05	0
Pinus herrerae	PH-R	25	0.99971	0	0	0	0.00029	0
Pinus herrerae	PH-R	28	0.99975	0	0	0	0.00025	0
Pinus herrerae	PH-R	31	0.99969	0	0	0	0.00031	0
Pinus herrerae	PH-R	34	0.99998	0	0	0	2e-05	0
Pinus herrerae	PH-R	37	0.99635	0	0	0	0.00365	0
Pinus herrerae	PH-R	40	0.99999	0	0	0	1e-05	0
Pinus herrerae	PH-R	43	0.99962	0	0	0	0.00038	0
Pinus herrerae	PH-R	46	0.9996	0	0	0	0.0004	0
Pinus herrerae	PH-R	52	0.99859	0	0	0	0.00141	0
Pinus herrerae	PH-R	55	0.99998	0	0	0	2e-05	0
Pinus herrerae	PH-R	61	0.99547	0	0	0	0.00453	0
Pinus herrerae	PH-R	67	0.99414	0	0	0	0.00586	0
Pinus herrerae	PH-R	70	0.98481	0	0	1e-05	0.01518	0
Pinus herrerae	PH-R	73	0.99895	0	0	0	0.00105	0
Pinus herrerae	PH-R	76	0.99963	0	0	0	0.00037	0
Pinus herrerae	PH-R	82	0.99983	0	0	0	0.00017	0
Pinus herrerae	PH-R	85	0.99978	0	0	0	0.00022	0
Pinus herrerae	PH-R	88	0.99993	0	0	0	7e-05	0
Pinus herrerae	PH-R	91	0.99984	0	0	0	0.00016	0
Pinus herrerae	PH-R	100	0.99999	0	0	0	1e-05	0
Pinus herrerae	PH-R	103	0.9999	0	0	0	0.0001	0
Pinus herrerae	PH-R	106	0.99999	0	0	0	1e-05	0
Pinus herrerae	PH-R	109	0.99853	0	0	0	0.00147	0
Pinus herrerae	PH-R	118	0.99993	0	0	0	7e-05	0
Pinus herrerae	PH-R	121	0.99995	0	0	0	5e-05	0
Pinus herrerae	PH-R	127	0.99994	0	0	0	6e-05	0
Pinus herrerae	PH-R	130	0.99999	0	0	0	1e-05	0
Pinus herrerae	PH-V	1	0.99949	0	0	0	0.00051	0
Pinus herrerae	PH-V	4	1	0	0	0	0	0
Pinus herrerae	PH-V	7	0.99764	0	0	0	0.00235	0
Pinus herrerae	PH-V	10	0.99995	0	0	0	5e-05	0
Pinus herrerae	PH-V	13	0.99729	0	0	0	0.00271	0
Pinus herrerae	PH-V	19	0.99831	0	0	0	0.00169	0
Pinus herrerae	PH-V	22	0.91706	0	0.00022	0.00066	0.08207	0
Pinus herrerae	PH-V	25	0.97669	0	0	0	0.0233	0
Pinus herrerae	PH-V	28	0	0.08856	0	0.00406	0	0.90738
Pinus herrerae	PH-V	31	0.99932	0	0	0	0.00068	0
Pinus herrerae	PH-V	34	0.99994	0	0	0	6e-05	0
Pinus herrerae	PH-V	37	0.99985	0	0	0	0.00015	0
Pinus herrerae	PH-V	40	0.9998	0	0	0	0.0002	0
Pinus herrerae	PH-V	43	0.99456	0	0	0	0.00543	0
Pinus herrerae	PH-V	46	0.99501	0	0	0	0.00498	0
Pinus herrerae	PH-V	49	0.99998	0	0	0	2e-05	0
Pinus herrerae	PH-V	52	1	0	0	0	0	0
Pinus herrerae	PH-V	55	0.99967	0	0	0	0.00033	0
Pinus herrerae	PH-V	58	0.99997	0	0	0	3e-05	0
Pinus herrerae	PH-V	61	0.99975	0	0	0	0.00025	0
Pinus herrerae	PH-V	64	0.99999	0	0	0	1e-05	0
Pinus herrerae	PH-V	67	0.99985	0	0	0	0.00015	0
Pinus herrerae	PH-V	79	0.99987	0	0	0	0.00013	0
Pinus herrerae	PH-V	82	0.99982	0	0	0	0.00018	0
Pinus herrerae	PH-V	86	0.99996	0	0	0	4e-05	0
Pinus herrerae	PH-V	94	0.99356	0	0	0	0.00644	0
Pinus herrerae	PH-V	97	0.99982	0	0	0	0.00018	0
Pinus herrerae	PH-V	100	0.99781	0	0	0	0.00219	0
Pinus herrerae	PH-V	106	0.99679	0	0	0	0.00321	0
Pinus herrerae	PH-V	109	0.99998	0	0	0	2e-05	0
Pinus herrerae	PH-V	118	0.99992	0	0	0	8e-05	0
Pinus herrerae	PH-V	121	0.98013	0	5e-05	0.00017	0.01965	0
Pinus herrerae	PH-V	124	0.9988	0	0	0	0.0012	0
Pinus herrerae	PH-V	127	0.99998	0	0	0	2e-05	0
Pinus herrerae	PH-V	130	0.99883	0	0	0	0.00117	0
Pinus luzmariae	PL-L	1	0	0.17339	0.00062	0.00777	0	0.81822
Pinus luzmariae	PL-L	7	0	0.81532	0	1e-05	0	0.18467
Pinus luzmariae	PL-L	10	0	0.00514	5e-05	0.07105	0	0.92375
Pinus luzmariae	PL-L	16	0	0.77012	0	1e-05	0	0.22987
Pinus luzmariae	PL-L	18	0	0.50539	3e-05	0.00017	0	0.49441
Pinus luzmariae	PL-L	22	0	0.04818	0.00033	0.00078	0	0.95071
Pinus luzmariae	PL-L	25	0	0.00054	0.00735	0.06277	6e-05	0.92928
Pinus luzmariae	PL-L	28	0	0.00109	0.02375	0.03457	8e-05	0.94051
Pinus luzmariae	PL-L	34	0	0.0016	0.01885	0.04731	7e-05	0.93217
Pinus luzmariae	PL-L	37	0	0.02811	0.00047	0.00266	0	0.96875
Pinus luzmariae	PL-L	40	0	0.16384	2e-05	0.00037	0	0.83577
Pinus luzmariae	PL-L	43	0	0.0003	0.04068	0.08234	0.00019	0.87648
Pinus luzmariae	PL-L	46	0	0.2475	0.00012	0.00037	0	0.75201
Pinus luzmariae	PL-L	49	0	0.01147	0.0008	0.005	0	0.98273
Pinus luzmariae	PL-L	52	0	0.0008	0.00506	0.00415	0	0.98999
Pinus luzmariae	PL-L	55	0	0.31236	3e-05	5e-05	0	0.68756
Pinus luzmariae	PL-L	58	0	0.02542	0.00207	0.01227	0	0.96025
Pinus luzmariae	PL-L	61	0	0.94853	0	0	0	0.05147
Pinus luzmariae	PL-L	64	0	0.99629	0	0	0	0.00371
Pinus luzmariae	PL-L	67	0	0.99987	0	0	0	0.00013
Pinus luzmariae	PL-L	70	0	0.00172	0.01633	0.03224	4e-05	0.94967
Pinus luzmariae	PL-L	73	0	0.03179	0.0012	0.0011	0	0.9659
Pinus luzmariae	PL-L	76	0	0.8863	0	1e-05	0	0.11369
Pinus luzmariae	PL-L	79	0	0.03712	0.00072	0.00245	0	0.95971
Pinus luzmariae	PL-L	82	0	0.01305	0.00107	0.00398	0	0.9819
Pinus luzmariae	PL-L	88	0	0.00133	0.01545	0.01732	4e-05	0.96586
Pinus luzmariae	PL-L	97	0	0.00016	0.07705	0.04094	0.00018	0.88168
Pinus luzmariae	PL-L	103	0	0.00042	0.01992	0.05478	8e-05	0.9248
Pinus luzmariae	PL-L	106	0	0.51891	3e-05	0.00014	0	0.48092
Pinus luzmariae	PL-L	109	0	0.0347	0.00154	0.00227	0	0.96149
Pinus luzmariae	PL-L	112	0	0.00967	0.00079	0.00131	0	0.98824
Pinus luzmariae	PL-L	118	0	0.0012	0.04717	0.04373	0.00024	0.90767
Pinus luzmariae	PL-L	121	0	0.01337	0.0031	0.00231	0	0.98121
Pinus luzmariae	PL-L	127	0	0.0156	0.0002	8e-05	0	0.98411
Pinus luzmariae	PL-L	130	0	0	0.52613	0.1293	0.00566	0.33891
Pinus luzmariae	PL-T	1	0	0.79077	0	6e-05	0	0.20917
Pinus luzmariae	PL-T	4	0	0.38766	4e-05	0.00095	0	0.61136
Pinus luzmariae	PL-T	7	0	0.96614	0	0	0	0.03385
Pinus luzmariae	PL-T	10	0	0.94216	0	1e-05	0	0.05783
Pinus luzmariae	PL-T	13	0	0.98677	0	0	0	0.01323
Pinus luzmariae	PL-T	16	0	0.0538	0.00135	0.00163	0	0.94322
Pinus luzmariae	PL-T	19	0	0.99794	0	0	0	0.00206
Pinus luzmariae	PL-T	22	0	0.98396	0	0	0	0.01604
Pinus luzmariae	PL-T	25	0	0.95843	0	0	0	0.04157
Pinus luzmariae	PL-T	28	0	0.99535	0	0	0	0.00465
Pinus luzmariae	PL-T	31	0	0.99581	0	0	0	0.00419
Pinus luzmariae	PL-T	37	0	0.9994	0	0	0	0.0006
Pinus luzmariae	PL-T	43	0	0.73961	1e-05	2e-05	0	0.26036
Pinus luzmariae	PL-T	46	0	0.87582	0	0	0	0.12418
Pinus luzmariae	PL-T	52	0	0.95813	0	0	0	0.04187
Pinus luzmariae	PL-T	55	0	0.98821	0	0	0	0.01179
Pinus luzmariae	PL-T	58	0	0.96754	0	0	0	0.03246
Pinus luzmariae	PL-T	61	0	0.27594	0.00032	0.0008	0	0.72295
Pinus luzmariae	PL-T	64	0	0.00872	0.00125	0.00057	0	0.98947
Pinus luzmariae	PL-T	67	0	0.99346	0	0	0	0.00654
Pinus luzmariae	PL-T	70	0	0.63709	1e-05	1e-05	0	0.3629
Pinus luzmariae	PL-T	73	0	0.80648	1e-05	4e-05	0	0.19347
Pinus luzmariae	PL-T	76	0	0.70538	2e-05	0.00011	0	0.29449
Pinus luzmariae	PL-T	85	0	0.96225	0	0	0	0.03775
Pinus luzmariae	PL-T	91	0	0.96214	0	0	0	0.03785
Pinus luzmariae	PL-T	97	0	0.90981	0	1e-05	0	0.09018
Pinus luzmariae	PL-T	100	0	0.043	0.00089	0.00043	0	0.95568
Pinus luzmariae	PL-T	103	0	0.99976	0	0	0	0.00024
Pinus luzmariae	PL-T	112	0	0.97853	0	0	0	0.02147
Pinus luzmariae	PL-T	118	0	0.0979	0.00033	0.00016	0	0.90162
Pinus luzmariae	PL-T	121	0	0.99658	0	0	0	0.00342
Pinus luzmariae	PL-T	124	0	0.95742	0	0	0	0.04257
Pinus luzmariae	PL-T	130	0	0.99003	0	0	0	0.00997
